# Supplementary material for: Phenotype–genotype network construction and characterization: a case study of cardiovascular diseases and associated non-coding RNAs
Source: Oxford University Press journal article supplement (doi:10.1093/database/baz147), 2019-12-11
Supplement: supplementary_1_baz147.pdf [file supplementary_1_baz147.pdf]

**Supplementary File 1:***The list of universal miRNAs and specific miRNAs.*

|            | <b>Specific miRNA</b> | <b>Universal miRNA</b> |
|------------|-----------------------|------------------------|
| <b>1.</b>  | hiv1-miR-H1           | hcmv-miR-UL22A-5p      |
| <b>2.</b>  | HS_202.1              | hsa-let-7a-5p          |
| <b>3.</b>  | hsa-let-7b-3p         | hsa-let-7b-5p          |
| <b>4.</b>  | hsa-let-7d-3p         | hsa-let-7c             |
| <b>5.</b>  | hsa-let-7d-5p         | hsa-let-7e-5p          |
| <b>6.</b>  | hsa-let-7f-1-3p       | hsa-let-7f-5p          |
| <b>7.</b>  | hsa-miR-105-5p        | hsa-let-7g-5p          |
| <b>8.</b>  | hsa-miR-106-5p        | hsa-let-7i-5p          |
| <b>9.</b>  | hsa-miR-106a-5p       | hsa-miR-100-5p         |
| <b>10.</b> | hsa-miR-10a-3p        | hsa-miR-101-3p         |
| <b>11.</b> | hsa-miR-10b-3p        | hsa-miR-103a-3p        |
| <b>12.</b> | hsa-miR-1183          | hsa-miR-106b-5p        |
| <b>13.</b> | hsa-miR-1202          | hsa-miR-107            |
| <b>14.</b> | hsa-miR-1207-5p       | hsa-miR-10a-5p         |
| <b>15.</b> | hsa-miR-122-3p        | hsa-miR-10b-5p         |
| <b>16.</b> | hsa-miR-1224-5p       | hsa-miR-122-5p         |
| <b>17.</b> | hsa-miR-1225-3p       | hsa-miR-124-3p         |
| <b>18.</b> | hsa-miR-1225-5p       | hsa-miR-1246           |
| <b>19.</b> | hsa-miR-1228-3p       | hsa-miR-1254           |
| <b>20.</b> | hsa-miR-1228-5p       | hsa-miR-125a-5p        |
| <b>21.</b> | hsa-miR-1231          | hsa-miR-125b-5p        |
| <b>22.</b> | hsa-miR-1233-3p       | hsa-miR-126-3p         |
| <b>23.</b> | hsa-miR-1234-3p       | hsa-miR-1274A          |
| <b>24.</b> | hsa-miR-1237-3p       | hsa-miR-129-5p         |
| <b>25.</b> | hsa-miR-1238-3p       | hsa-miR-130            |
| <b>26.</b> | hsa-miR-124-5p        | hsa-miR-1306-3p        |
| <b>27.</b> | hsa-miR-1250          | hsa-miR-130a-3p        |
| <b>28.</b> | hsa-miR-1251          | hsa-miR-132-3p         |
| <b>29.</b> | hsa-miR-125a-3p       | hsa-miR-133            |
| <b>30.</b> | hsa-miR-1260a         | hsa-miR-133a           |
| <b>31.</b> | hsa-miR-126-5p        | hsa-miR-133b           |
| <b>32.</b> | hsa-miR-1273a         | hsa-miR-134            |
| <b>33.</b> | hsa-miR-1281          | hsa-miR-134-5p         |
| <b>34.</b> | hsa-miR-1285-3p       | hsa-miR-135a-5p        |
| <b>35.</b> | hsa-miR-128b          | hsa-miR-135b-5p        |
| <b>36.</b> | hsa-miR-1291          | hsa-miR-136-5p         |
| <b>37.</b> | hsa-miR-1299          | hsa-miR-138-5p         |
| <b>38.</b> | hsa-miR-130b-3p       | hsa-miR-139-5p         |

|     |                   |                 |
|-----|-------------------|-----------------|
| 39. | hsa-miR-133a2     | hsa-miR-1-3p    |
| 40. | hsa-miR-133a-2    | hsa-miR-140-3p  |
| 41. | hsa-miR-135b-3p   | hsa-miR-140-5p  |
| 42. | hsa-miR-137       | hsa-miR-142-3p  |
| 43. | hsa-miR-143-5p    | hsa-miR-142-5p  |
| 44. | hsa-miR-143-MM2   | hsa-miR-143-3p  |
| 45. | hsa-miR-146b-3p   | hsa-miR-144-3p  |
| 46. | hsa-miR-15        | hsa-miR-145-5p  |
| 47. | hsa-miR-150-3p    | hsa-miR-146a-5p |
| 48. | hsa-miR-151a-3p   | hsa-miR-146b-5p |
| 49. | hsa-miR-151a-5p   | hsa-miR-147a    |
| 50. | hsa-miR-152       | hsa-miR-148a-3p |
| 51. | hsa-miR-153       | hsa-miR-148b-3p |
| 52. | hsa-miR-17-3p     | hsa-miR-149-5p  |
| 53. | hsa-miR-181a-2-3p | hsa-miR-150-5p  |
| 54. | hsa-miR-181a-3p   | hsa-miR-155-5p  |
| 55. | hsa-miR-181c-3p   | hsa-miR-15a-5p  |
| 56. | hsa-miR-181c-5p   | hsa-miR-15b-5p  |
| 57. | hsa-miR-181d-5p   | hsa-miR-16-5p   |
| 58. | hsa-miR-182-5p    | hsa-miR-17-5p   |
| 59. | hsa-miR-183-3p    | hsa-miR-181a-5p |
| 60. | hsa-miR-18b-5p    | hsa-miR-181b-5p |
| 61. | hsa-miR-190a      | hsa-miR-184     |
| 62. | hsa-miR-190b      | hsa-miR-185-5p  |
| 63. | hsa-miR-191-3p    | hsa-miR-186-5p  |
| 64. | hsa-miR-1915-3p   | hsa-miR-18a-5p  |
| 65. | hsa-miR-191-5p    | hsa-miR-18b-3p  |
| 66. | hsa-miR-193-5p    | hsa-miR-192-5p  |
| 67. | hsa-miR-193a-3p   | hsa-miR-194-5p  |
| 68. | hsa-miR-193a-5p   | hsa-miR-195-5p  |
| 69. | hsa-miR-193b-3p   | hsa-miR-196a2   |
| 70. | hsa-miR-193b-5p   | hsa-miR-197-3p  |
| 71. | hsa-miR-195-3p    | hsa-miR-199     |
| 72. | hsa-miR-196a-5p   | hsa-miR-199a-3p |
| 73. | hsa-miR-196b-5p   | hsa-miR-199a-5p |
| 74. | hsa-miR-199b-3p   | hsa-miR-199b-5p |
| 75. | hsa-miR-200a-3p   | hsa-miR-19a-3p  |
| 76. | hsa-miR-200b-5p   | hsa-miR-19b-3p  |
| 77. | hsa-miR-200c-3p   | hsa-miR-204-5p  |
| 78. | hsa-miR-202-3p    | hsa-miR-205-5p  |
| 79. | hsa-miR-208b-3p   | hsa-miR-206     |
| 80. | hsa-miR-20a-3p    | hsa-miR-208a    |
| 81. | hsa-miR-20b-5p    | hsa-miR-208a-3p |

|             |                  |                 |
|-------------|------------------|-----------------|
| <b>82.</b>  | hsa-miR-217      | hsa-miR-208b    |
| <b>83.</b>  | hsa-miR-219a-5p  | hsa-miR-20a-5p  |
| <b>84.</b>  | hsa-miR-220      | hsa-miR-210     |
| <b>85.</b>  | hsa-miR-2222     | hsa-miR-211-5p  |
| <b>86.</b>  | hsa-miR-222-5p   | hsa-miR-212-3p  |
| <b>87.</b>  | hsa-miR-223-5p   | hsa-miR-21-3p   |
| <b>88.</b>  | hsa-miR-22-5p    | hsa-miR-214-3p  |
| <b>89.</b>  | hsa-miR-23       | hsa-miR-21-5p   |
| <b>90.</b>  | hsa-miR-23b-5p   | hsa-miR-218-5p  |
| <b>91.</b>  | hsa-miR-24-2-5p  | hsa-miR-221-3p  |
| <b>92.</b>  | hsa-miR-2861     | hsa-miR-222-3p  |
| <b>93.</b>  | hsa-miR-2909     | hsa-miR-223-3p  |
| <b>94.</b>  | hsa-miR-299-5p   | hsa-miR-22-3p   |
| <b>95.</b>  | hsa-miR-30       | hsa-miR-23a-3p  |
| <b>96.</b>  | hsa-miR-300      | hsa-miR-23b-3p  |
| <b>97.</b>  | hsa-miR-302d-3p  | hsa-miR-24-3p   |
| <b>98.</b>  | hsa-miR-30b-5p   | hsa-miR-25-3p   |
| <b>99.</b>  | hsa-miR-30c-2-3p | hsa-miR-26a-5p  |
| <b>100.</b> | hsa-miR-3135b    | hsa-miR-26b-5p  |
| <b>101.</b> | hsa-miR-3144-5p  | hsa-miR-27a-3p  |
| <b>102.</b> | hsa-miR-31-5p    | hsa-miR-27b-3p  |
| <b>103.</b> | hsa-miR-3162-3p  | hsa-miR-28-5p   |
| <b>104.</b> | hsa-miR-3171     | hsa-miR-29      |
| <b>105.</b> | hsa-miR-3188     | hsa-miR-296-5p  |
| <b>106.</b> | hsa-miR-320c     | hsa-miR-29a-3p  |
| <b>107.</b> | hsa-miR-320e     | hsa-miR-29b-3p  |
| <b>108.</b> | hsa-miR-322      | hsa-miR-29c-3p  |
| <b>109.</b> | hsa-miR-32-3p    | hsa-miR-30*     |
| <b>110.</b> | hsa-miR-324-3p   | hsa-miR-301a-3p |
| <b>111.</b> | hsa-miR-32-5p    | hsa-miR-302a-3p |
| <b>112.</b> | hsa-miR-338-3p   | hsa-miR-302b-3p |
| <b>113.</b> | hsa-miR-339-3p   | hsa-miR-302c-3p |
| <b>114.</b> | hsa-miR-33b-3p   | hsa-miR-30a-5p  |
| <b>115.</b> | hsa-miR-33b-5p   | hsa-miR-30c-5p  |
| <b>116.</b> | hsa-miR-340-5p   | hsa-miR-30d-5p  |
| <b>117.</b> | hsa-miR-342-3p   | hsa-miR-30e-5p  |
| <b>118.</b> | hsa-miR-345-5p   | hsa-miR-3130-5p |
| <b>119.</b> | hsa-miR-34b-3p   | hsa-miR-3149    |
| <b>120.</b> | hsa-miR-34c-5p   | hsa-miR-320a    |
| <b>121.</b> | hsa-miR-361-5p   | hsa-miR-320b    |
| <b>122.</b> | hsa-miR-362-3p   | hsa-miR-320d    |
| <b>123.</b> | hsa-miR-367-3p   | hsa-miR-323a-3p |
| <b>124.</b> | hsa-miR-371a-3p  | hsa-miR-326     |

|             |                 |                 |
|-------------|-----------------|-----------------|
| <b>125.</b> | hsa-miR-371a-5p | hsa-miR-328     |
| <b>126.</b> | hsa-miR-372     | hsa-miR-331-3p  |
| <b>127.</b> | hsa-miR-373-3p  | hsa-miR-335-5p  |
| <b>128.</b> | hsa-miR-376a-3p | hsa-miR-339-5p  |
| <b>129.</b> | hsa-miR-376c-3p | hsa-miR-33a-5p  |
| <b>130.</b> | hsa-miR-377-3p  | hsa-miR-340-3p  |
| <b>131.</b> | hsa-miR-380-5p  | hsa-miR-34a-5p  |
| <b>132.</b> | hsa-miR-381-3p  | hsa-miR-34b-5p  |
| <b>133.</b> | hsa-miR-383     | hsa-miR-3615    |
| <b>134.</b> | hsa-miR-3908    | hsa-miR-363-3p  |
| <b>135.</b> | hsa-miR-409-3p  | hsa-miR-365a-3p |
| <b>136.</b> | hsa-miR-409-5p  | hsa-miR-369-3p  |
| <b>137.</b> | hsa-miR-411-5p  | hsa-miR-370     |
| <b>138.</b> | hsa-miR-421     | hsa-miR-375     |
| <b>139.</b> | hsa-miR-422     | hsa-miR-378a-3p |
| <b>140.</b> | hsa-miR-423-3p  | hsa-miR-378a-5p |
| <b>141.</b> | hsa-miR-425-3p  | hsa-miR-382-5p  |
| <b>142.</b> | hsa-miR-4254    | hsa-miR-422a    |
| <b>143.</b> | hsa-miR-425-5p  | hsa-miR-423-5p  |
| <b>144.</b> | hsa-miR-4306    | hsa-miR-424-5p  |
| <b>145.</b> | hsa-miR-4429    | hsa-miR-429     |
| <b>146.</b> | hsa-miR-4478    | hsa-miR-432-5p  |
| <b>147.</b> | hsa-miR-4491    | hsa-miR-433     |
| <b>148.</b> | hsa-miR-452-5p  | hsa-miR-451a    |
| <b>149.</b> | hsa-miR-455-3p  | hsa-miR-454-3p  |
| <b>150.</b> | hsa-miR-455-5p  | hsa-miR-483-3p  |
| <b>151.</b> | hsa-miR-4643    | hsa-miR-483-5p  |
| <b>152.</b> | hsa-miR-485-3p  | hsa-miR-486-5p  |
| <b>153.</b> | hsa-miR-486-3p  | hsa-miR-487b    |
| <b>154.</b> | hsa-miR-490-3p  | hsa-miR-489     |
| <b>155.</b> | hsa-miR-491-3p  | hsa-miR-493-5p  |
| <b>156.</b> | hsa-miR-491-5p  | hsa-miR-494     |
| <b>157.</b> | hsa-miR-492     | hsa-miR-495-3p  |
| <b>158.</b> | hsa-miR-497-3p  | hsa-miR-497-5p  |
| <b>159.</b> | hsa-miR-498     | hsa-miR-499a-5p |
| <b>160.</b> | hsa-miR-499a-3p | hsa-miR-500a-3p |
| <b>161.</b> | hsa-miR-503-5p  | hsa-miR-519e-5p |
| <b>162.</b> | hsa-miR-507     | hsa-miR-523-3p  |
| <b>163.</b> | hsa-miR-508-5p  | hsa-miR-532-5p  |
| <b>164.</b> | hsa-miR-512-5p  | hsa-miR-622     |
| <b>165.</b> | hsa-miR-515-5p  | hsa-miR-625-5p  |
| <b>166.</b> | hsa-miR-516a-5p | hsa-miR-636     |
| <b>167.</b> | hsa-miR-518f-3p | hsa-miR-720     |

|             |                 |                |
|-------------|-----------------|----------------|
| <b>168.</b> | hsa-miR-520b    | hsa-miR-770-5p |
| <b>169.</b> | hsa-miR-520c-3p | hsa-miR-877-3p |
| <b>170.</b> | hsa-miR-520d-3p | hsa-miR-92a-3p |
| <b>171.</b> | hsa-miR-520d-5p | hsa-miR-9-5p   |
| <b>172.</b> | hsa-miR-520h    | hsa-miR-96-5p  |
| <b>173.</b> | hsa-miR-524-5p  | hsa-miR-98-5p  |
| <b>174.</b> | hsa-miR-525-5p  | hsa-miR-99b-5p |
| <b>175.</b> | hsa-miR-526b-5p | hsv1-miR-H2-3p |
| <b>176.</b> | hsa-miR-542-3p  |                |
| <b>177.</b> | hsa-miR-544a    |                |
| <b>178.</b> | hsa-miR-545-5p  |                |
| <b>179.</b> | hsa-miR-548c-3p |                |
| <b>180.</b> | hsa-miR-550a-3p |                |
| <b>181.</b> | hsa-miR-5571-5p |                |
| <b>182.</b> | hsa-miR-558     |                |
| <b>183.</b> | hsa-miR-563     |                |
| <b>184.</b> | hsa-miR-566     |                |
| <b>185.</b> | hsa-miR-574-3p  |                |
| <b>186.</b> | hsa-miR-574-5p  |                |
| <b>187.</b> | hsa-miR-575     |                |
| <b>188.</b> | hsa-miR-59      |                |
| <b>189.</b> | hsa-miR-590-5p  |                |
| <b>190.</b> | hsa-miR-598     |                |
| <b>191.</b> | hsa-miR-602     |                |
| <b>192.</b> | hsa-miR-605     |                |
| <b>193.</b> | hsa-miR-618     |                |
| <b>194.</b> | hsa-miR-624-5p  |                |
| <b>195.</b> | hsa-miR-631     |                |
| <b>196.</b> | hsa-miR-638     |                |
| <b>197.</b> | hsa-miR-639     |                |
| <b>198.</b> | hsa-miR-646     |                |
| <b>199.</b> | hsa-miR-650     |                |
| <b>200.</b> | hsa-miR-652-3p  |                |
| <b>201.</b> | hsa-miR-656     |                |
| <b>202.</b> | hsa-miR-657     |                |
| <b>203.</b> | hsa-miR-660-3p  |                |
| <b>204.</b> | hsa-miR-660-5p  |                |
| <b>205.</b> | hsa-miR-663a    |                |
| <b>206.</b> | hsa-miR-663b    |                |
| <b>207.</b> | hsa-miR-664a-3p |                |
| <b>208.</b> | hsa-miR-665     |                |
| <b>209.</b> | hsa-miR-671-5p  |                |
| <b>210.</b> | hsa-miR-675-5p  |                |

|      |                |  |
|------|----------------|--|
| 211. | hsa-miR-708-5p |  |
| 212. | hsa-miR-7-1-3p |  |
| 213. | hsa-miR-758-3p |  |
| 214. | hsa-miR-765    |  |
| 215. | hsa-miR-802    |  |
| 216. | hsa-miR-873-5p |  |
| 217. | hsa-miR-874-3p |  |
| 218. | hsa-miR-875-3p |  |
| 219. | hsa-miR-886-3p |  |
| 220. | hsa-miR-892a   |  |
| 221. | hsa-miR-892b   |  |
| 222. | hsa-miR-92b-3p |  |
| 223. | hsa-miR-93-3p  |  |
| 224. | hsa-miR-93-5p  |  |
| 225. | hsa-miR-939-5p |  |
| 226. | hsa-miR-940    |  |
| 227. | hsa-miR-99a-5p |  |
| 228. | mmu_let_7d     |  |
| 229. | mmu_miR_129_3p |  |
| 230. | mmu_miR_17_3p  |  |
| 231. | mmu_miR_215    |  |
| 232. | mmu_miR_292_3p |  |
| 233. | mmu_miR_294    |  |
| 234. | mmu_miR_295    |  |
| 235. | mmu_miR_297    |  |
| 236. | mmu_miR_300    |  |
| 237. | mmu_miR_322    |  |
| 238. | mmu_miR_330    |  |
| 239. | mmu_miR_341    |  |
| 240. | mmu-miR-192    |  |
| 241. | mmu-miR-325    |  |
| 242. | N1             |  |
| 243. | N2             |  |
| 244. | pRe-miR-138    |  |
| 245. | pRe-miR-146a   |  |
| 246. | pre-miR-27a    |  |
| 247. | pRe-miR-499    |  |
| 248. | Rno_miR_297    |  |
| 249. | Rno_miR_333    |  |
| 250. | Rno_miR_343    |  |
| 251. | Rno-miR-352    |  |
