# Supplementary material for: Phenotype–genotype network construction and characterization: a case study of cardiovascular diseases and associated non-coding RNAs
Source: Oxford University Press journal article supplement (doi:10.1093/database/baz147), 2019-12-11
Supplement: supplementary_2_baz147.pdf [file supplementary_2_baz147.pdf]

**Supplementary File 2:**

***IPA enrichment pathways of the targets of universal miRNAs and specific miRNAs***

| <b>Specific miRNAs</b>                                                |         |          |                     |                            |                    |       |
|-----------------------------------------------------------------------|---------|----------|---------------------|----------------------------|--------------------|-------|
| Ingenuity Canonical Pathways                                          | -log(p) | p        | adjusted p<br>(FDR) | adjusted p<br>(bonferroni) | adjusted p<br>(BH) | Ratio |
| Small Cell Lung Cancer Signaling                                      | 3.26    | 0.00055  | 0.072013            | 0.222015                   | 0.072013           | 0.824 |
| Production of Nitric Oxide and Reactive Oxygen Species in Macrophages | 3.26    | 0.00055  | 0.072013            | 0.222015                   | 0.072013           | 0.824 |
| Pancreatic Adenocarcinoma Signaling                                   | 3.11    | 0.000776 | 0.072013            | 0.313604                   | 0.072013           | 0.789 |
| B Cell Receptor Signaling                                             | 3.11    | 0.000776 | 0.072013            | 0.313604                   | 0.072013           | 0.789 |
| UVB-Induced MAPK Signaling                                            | 3.05    | 0.000891 | 0.072013            | 0.360065                   | 0.072013           | 0.909 |
| Tec Kinase Signaling                                                  | 2.63    | 0.002344 | 0.136195            | 0.947068                   | 0.136195           | 0.8   |
| Role of Tissue Factor in Cancer                                       | 2.51    | 0.00309  | 0.136195            | 1                          | 0.136195           | 0.765 |
| UVA-Induced MAPK Signaling                                            | 2.47    | 0.003388 | 0.136195            | 1                          | 0.136195           | 0.833 |
| Sumoylation Pathway                                                   | 2.47    | 0.003388 | 0.136195            | 1                          | 0.136195           | 0.833 |
| HGF Signaling                                                         | 2.43    | 0.003715 | 0.136195            | 1                          | 0.136195           | 0.737 |
| ILK Signaling                                                         | 2.36    | 0.004365 | 0.136195            | 1                          | 0.136195           | 0.714 |
| LPS-stimulated MAPK Signaling                                         | 2.33    | 0.004677 | 0.136195            | 1                          | 0.136195           | 0.786 |
| PI3K/AKT Signaling                                                    | 2.33    | 0.004677 | 0.136195            | 1                          | 0.136195           | 0.786 |
| Prostate Cancer Signaling                                             | 2.23    | 0.005888 | 0.136195            | 1                          | 0.136195           | 0.75  |
| RANK Signaling in Osteoclasts                                         | 2.23    | 0.005888 | 0.136195            | 1                          | 0.136195           | 0.75  |
| Molecular Mechanisms of Cancer                                        | 2.2     | 0.00631  | 0.136195            | 1                          | 0.136195           | 0.6   |
| Non-Small Cell Lung Cancer Signaling                                  | 2.16    | 0.006918 | 0.136195            | 1                          | 0.136195           | 0.722 |
| EIF2 Signaling                                                        | 2.16    | 0.006918 | 0.136195            | 1                          | 0.136195           | 0.722 |
| Neurotrophin/TRK Signaling                                            | 2.16    | 0.006918 | 0.136195            | 1                          | 0.136195           | 0.722 |
| PEDF Signaling                                                        | 2.15    | 0.007079 | 0.136195            | 1                          | 0.136195           | 0.818 |
| Death Receptor Signaling                                              | 2.15    | 0.007079 | 0.136195            | 1                          | 0.136195           | 0.818 |
| IGF-1 Signaling                                                       | 2.1     | 0.007943 | 0.139642            | 1                          | 0.139642           | 0.7   |
| Relaxin Signaling                                                     | 2.03    | 0.009333 | 0.139642            | 1                          | 0.139642           | 0.769 |
| FLT3 Signaling in Hematopoietic Progenitor Cells                      | 2.03    | 0.009333 | 0.139642            | 1                          | 0.139642           | 0.769 |
| Myc Mediated Apoptosis Signaling                                      | 2.03    | 0.009333 | 0.139642            | 1                          | 0.139642           | 0.769 |
| SAPK/JNK Signaling                                                    | 2.03    | 0.009333 | 0.139642            | 1                          | 0.139642           | 0.769 |
| IL-7 Signaling Pathway                                                | 2.03    | 0.009333 | 0.139642            | 1                          | 0.139642           | 0.769 |
| Estrogen-Dependent Breast Cancer Signaling                            | 1.95    | 0.01122  | 0.143836            | 1                          | 0.143836           | 0.733 |
| Activation of IRF by Cytosolic Pattern Recognition Receptors          | 1.93    | 0.011749 | 0.143836            | 1                          | 0.143836           | 1     |
| TNFR1 Signaling                                                       | 1.93    | 0.011749 | 0.143836            | 1                          | 0.143836           | 1     |
| TNFR2 Signaling                                                       | 1.93    | 0.011749 | 0.143836            | 1                          | 0.143836           | 1     |

|                                                            |      |          |          |   |          |       |
|------------------------------------------------------------|------|----------|----------|---|----------|-------|
| Inhibition of Angiogenesis by TSP1                         | 1.93 | 0.011749 | 0.143836 | 1 | 0.143836 | 1     |
| iNOS Signaling                                             | 1.93 | 0.011749 | 0.143836 | 1 | 0.143836 | 1     |
| NGF Signaling                                              | 1.89 | 0.012882 | 0.148701 | 1 | 0.148701 | 0.706 |
| Telomerase Signaling                                       | 1.89 | 0.012882 | 0.148701 | 1 | 0.148701 | 0.706 |
| Germ Cell-Sertoli Cell Junction Signaling                  | 1.85 | 0.014125 | 0.158518 | 1 | 0.158518 | 0.684 |
| RAR Activation                                             | 1.83 | 0.014791 | 0.161503 | 1 | 0.161503 | 0.667 |
| EGF Signaling                                              | 1.74 | 0.018197 | 0.173903 | 1 | 0.173903 | 0.75  |
| Apoptosis Signaling                                        | 1.74 | 0.018197 | 0.173903 | 1 | 0.173903 | 0.75  |
| IL-17 Signaling                                            | 1.68 | 0.020893 | 0.173903 | 1 | 0.173903 | 0.714 |
| P2Y Purigenic Receptor Signaling Pathway                   | 1.68 | 0.020893 | 0.173903 | 1 | 0.173903 | 0.714 |
| T Cell Receptor Signaling                                  | 1.68 | 0.020893 | 0.173903 | 1 | 0.173903 | 0.714 |
| IL-10 Signaling                                            | 1.66 | 0.021878 | 0.173903 | 1 | 0.173903 | 0.857 |
| 4-1BB Signaling in T Lymphocytes                           | 1.66 | 0.021878 | 0.173903 | 1 | 0.173903 | 0.857 |
| Retinoic acid Mediated Apoptosis Signaling                 | 1.66 | 0.021878 | 0.173903 | 1 | 0.173903 | 0.857 |
| Toll-like Receptor Signaling                               | 1.66 | 0.021878 | 0.173903 | 1 | 0.173903 | 0.857 |
| Apelin Pancreas Signaling Pathway                          | 1.66 | 0.021878 | 0.173903 | 1 | 0.173903 | 0.857 |
| 14-3-3-mediated Signaling                                  | 1.64 | 0.022909 | 0.173903 | 1 | 0.173903 | 0.688 |
| IL-12 Signaling and Production in Macrophages              | 1.64 | 0.022909 | 0.173903 | 1 | 0.173903 | 0.688 |
| CXCR4 Signaling                                            | 1.64 | 0.022909 | 0.173903 | 1 | 0.173903 | 0.688 |
| PDGF Signaling                                             | 1.64 | 0.022909 | 0.173903 | 1 | 0.173903 | 0.688 |
| AMPK Signaling                                             | 1.61 | 0.024547 | 0.173903 | 1 | 0.173903 | 0.667 |
| Sertoli Cell-Sertoli Cell Junction Signaling               | 1.61 | 0.024547 | 0.173903 | 1 | 0.173903 | 0.667 |
| p38 MAPK Signaling                                         | 1.61 | 0.024547 | 0.173903 | 1 | 0.173903 | 0.667 |
| IL-6 Signaling                                             | 1.61 | 0.024547 | 0.173903 | 1 | 0.173903 | 0.667 |
| Aryl Hydrocarbon Receptor Signaling                        | 1.6  | 0.025119 | 0.173903 | 1 | 0.173903 | 0.65  |
| Ovarian Cancer Signaling                                   | 1.58 | 0.026303 | 0.173903 | 1 | 0.173903 | 0.6   |
| Endocannabinoid Cancer Inhibition Pathway                  | 1.58 | 0.026303 | 0.173903 | 1 | 0.173903 | 0.636 |
| Role of PKR in Interferon Induction and Antiviral Response | 1.54 | 0.02884  | 0.173903 | 1 | 0.173903 | 1     |
| B Cell Activating Factor Signaling                         | 1.54 | 0.02884  | 0.173903 | 1 | 0.173903 | 1     |
| April Mediated Signaling                                   | 1.54 | 0.02884  | 0.173903 | 1 | 0.173903 | 1     |
| Unfolded protein response                                  | 1.54 | 0.02884  | 0.173903 | 1 | 0.173903 | 1     |
| CD27 Signaling in Lymphocytes                              | 1.54 | 0.02884  | 0.173903 | 1 | 0.173903 | 0.778 |
| Induction of Apoptosis by HIV1                             | 1.54 | 0.02884  | 0.173903 | 1 | 0.173903 | 0.778 |
| ATM Signaling                                              | 1.54 | 0.02884  | 0.173903 | 1 | 0.173903 | 0.778 |
| FGF Signaling                                              | 1.54 | 0.02884  | 0.173903 | 1 | 0.173903 | 0.778 |
| Cancer Drug Resistance By Drug Efflux                      | 1.54 | 0.02884  | 0.173903 | 1 | 0.173903 | 0.778 |

|                                                |      |          |          |   |          |       |
|------------------------------------------------|------|----------|----------|---|----------|-------|
| Thrombopoietin Signaling                       | 1.46 | 0.034674 | 0.187018 | 1 | 0.187018 | 0.727 |
| GDNF Family Ligand-Receptor Interactions       | 1.46 | 0.034674 | 0.187018 | 1 | 0.187018 | 0.727 |
| UVC-Induced MAPK Signaling                     | 1.46 | 0.034674 | 0.187018 | 1 | 0.187018 | 0.727 |
| IL-2 Signaling                                 | 1.46 | 0.034674 | 0.187018 | 1 | 0.187018 | 0.727 |
| IL-4 Signaling                                 | 1.46 | 0.034674 | 0.187018 | 1 | 0.187018 | 0.727 |
| CD40 Signaling                                 | 1.42 | 0.038019 | 0.187018 | 1 | 0.187018 | 0.692 |
| Aldosterone Signaling in Epithelial Cells      | 1.42 | 0.038019 | 0.187018 | 1 | 0.187018 | 0.692 |
| Thyroid Cancer Signaling                       | 1.42 | 0.038019 | 0.187018 | 1 | 0.187018 | 0.692 |
| Rac Signaling                                  | 1.42 | 0.038019 | 0.187018 | 1 | 0.187018 | 0.692 |
| PI3K Signaling in B Lymphocytes                | 1.42 | 0.038019 | 0.187018 | 1 | 0.187018 | 0.692 |
| ErbB2-ErbB3 Signaling                          | 1.42 | 0.038019 | 0.187018 | 1 | 0.187018 | 0.692 |
| TGF- $\beta$ Signaling                         | 1.42 | 0.038019 | 0.187018 | 1 | 0.187018 | 0.692 |
| BMP signaling pathway                          | 1.42 | 0.038019 | 0.187018 | 1 | 0.187018 | 0.692 |
| p53 Signaling                                  | 1.4  | 0.039811 | 0.187018 | 1 | 0.187018 | 0.667 |
| Ceramide Signaling                             | 1.4  | 0.039811 | 0.187018 | 1 | 0.187018 | 0.667 |
| Type I Diabetes Mellitus Signaling             | 1.4  | 0.039811 | 0.187018 | 1 | 0.187018 | 0.667 |
| Acute Myeloid Leukemia Signaling               | 1.4  | 0.039811 | 0.187018 | 1 | 0.187018 | 0.667 |
| Breast Cancer Regulation by Stathmin1          | 1.4  | 0.039811 | 0.187018 | 1 | 0.187018 | 0.667 |
| ErbB Signaling                                 | 1.4  | 0.039811 | 0.187018 | 1 | 0.187018 | 0.667 |
| ERK/MAPK Signaling                             | 1.39 | 0.040738 | 0.187324 | 1 | 0.187324 | 0.586 |
| HIF1 $\alpha$ Signaling                        | 1.38 | 0.041687 | 0.187324 | 1 | 0.187324 | 0.647 |
| Glioma Signaling                               | 1.38 | 0.041687 | 0.187324 | 1 | 0.187324 | 0.647 |
| GNRH Signaling                                 | 1.37 | 0.042658 | 0.187324 | 1 | 0.187324 | 0.632 |
| Cardiac Hypertrophy Signaling                  | 1.37 | 0.042658 | 0.187324 | 1 | 0.187324 | 0.619 |
| Osteoarthritis Pathway                         | 1.37 | 0.042658 | 0.187324 | 1 | 0.187324 | 0.619 |
| IL-1 Signaling                                 | 1.33 | 0.046774 | 0.198911 | 1 | 0.198911 | 0.833 |
| OX40 Signaling Pathway                         | 1.33 | 0.046774 | 0.198911 | 1 | 0.198911 | 0.833 |
| IL-17A Signaling in Gastric Cells              | 1.33 | 0.046774 | 0.198911 | 1 | 0.198911 | 0.833 |
| Colorectal Cancer Metastasis Signaling         | 1.28 | 0.052481 | 0.220856 | 1 | 0.220856 | 0.556 |
| Mitochondrial Dysfunction                      | 1.25 | 0.056234 | 0.224937 | 1 | 0.224937 | 0.75  |
| Fc $\gamma$ RIIB Signaling in B Lymphocytes    | 1.25 | 0.056234 | 0.224937 | 1 | 0.224937 | 0.75  |
| CCR5 Signaling in Macrophages                  | 1.25 | 0.056234 | 0.224937 | 1 | 0.224937 | 0.75  |
| Docosahexaenoic Acid (DHA) Signaling           | 1.25 | 0.056234 | 0.224937 | 1 | 0.224937 | 0.75  |
| Hypoxia Signaling in the Cardiovascular System | 1.25 | 0.056234 | 0.224937 | 1 | 0.224937 | 0.75  |
| IL-8 Signaling                                 | 1.22 | 0.060256 | 0.234874 | 1 | 0.234874 | 0.571 |
| Amyotrophic Lateral Sclerosis Signaling        | 1.2  | 0.063096 | 0.234874 | 1 | 0.234874 | 0.7   |
| CNTF Signaling                                 | 1.2  | 0.063096 | 0.234874 | 1 | 0.234874 | 0.7   |
| Cdc42 Signaling                                | 1.2  | 0.063096 | 0.234874 | 1 | 0.234874 | 0.7   |
| Glioma Invasiveness Signaling                  | 1.2  | 0.063096 | 0.234874 | 1 | 0.234874 | 0.7   |
| ErbB4 Signaling                                | 1.2  | 0.063096 | 0.234874 | 1 | 0.234874 | 0.7   |
| GM-CSF Signaling                               | 1.2  | 0.063096 | 0.234874 | 1 | 0.234874 | 0.7   |

|                                                             |       |          |          |   |          |       |
|-------------------------------------------------------------|-------|----------|----------|---|----------|-------|
| PTEN Signaling                                              | 1.18  | 0.066069 | 0.234874 | 1 | 0.234874 | 0.591 |
| mTOR Signaling                                              | 1.18  | 0.066069 | 0.234874 | 1 | 0.234874 | 0.667 |
| HER-2 Signaling in Breast Cancer                            | 1.18  | 0.066069 | 0.234874 | 1 | 0.234874 | 0.667 |
| IL-3 Signaling                                              | 1.17  | 0.067608 | 0.234874 | 1 | 0.234874 | 0.643 |
| Corticotropin Releasing Hormone Signaling                   | 1.17  | 0.067608 | 0.234874 | 1 | 0.234874 | 0.643 |
| Chronic Myeloid Leukemia Signaling                          | 1.17  | 0.067608 | 0.234874 | 1 | 0.234874 | 0.643 |
| PPAR Signaling                                              | 1.16  | 0.069183 | 0.234874 | 1 | 0.234874 | 0.611 |
| Leukocyte Extravasation Signaling                           | 1.16  | 0.069183 | 0.234874 | 1 | 0.234874 | 0.625 |
| Erythropoietin Signaling                                    | 1.16  | 0.069183 | 0.234874 | 1 | 0.234874 | 0.625 |
| Renal Cell Carcinoma Signaling                              | 1.16  | 0.069183 | 0.234874 | 1 | 0.234874 | 0.625 |
| PKC $\theta$ Signaling in T Lymphocytes                     | 1.16  | 0.069183 | 0.234874 | 1 | 0.234874 | 0.625 |
| Regulation of the Epithelial-Mesenchymal Transition Pathway | 1.06  | 0.087096 | 0.293224 | 1 | 0.293224 | 0.552 |
| Glioblastoma Multiforme Signaling                           | 1.03  | 0.093325 | 0.311257 | 1 | 0.311257 | 0.56  |
| MSP-RON Signaling Pathway                                   | 1.02  | 0.095499 | 0.311257 | 1 | 0.311257 | 0.8   |
| Sirtuin Signaling Pathway                                   | 0.996 | 0.100925 | 0.311257 | 1 | 0.311257 | 0.571 |
| Mouse Embryonic Stem Cell Pluripotency                      | 0.983 | 0.103992 | 0.311257 | 1 | 0.311257 | 0.579 |
| Hepatic Cholestasis                                         | 0.967 | 0.107895 | 0.311257 | 1 | 0.311257 | 0.588 |
| Clathrin-mediated Endocytosis Signaling                     | 0.967 | 0.107895 | 0.311257 | 1 | 0.311257 | 0.588 |
| Lymphotoxin $\beta$ Receptor Signaling                      | 0.967 | 0.107895 | 0.311257 | 1 | 0.311257 | 0.714 |
| Cholecystokinin/Gastrin-mediated Signaling                  | 0.967 | 0.107895 | 0.311257 | 1 | 0.311257 | 0.588 |
| Prolactin Signaling                                         | 0.967 | 0.107895 | 0.311257 | 1 | 0.311257 | 0.588 |
| Bladder Cancer Signaling                                    | 0.967 | 0.107895 | 0.311257 | 1 | 0.311257 | 0.588 |
| CD28 Signaling in T Helper Cells                            | 0.955 | 0.110917 | 0.311257 | 1 | 0.311257 | 0.6   |
| Melanocyte Development and Pigmentation Signaling           | 0.955 | 0.110917 | 0.311257 | 1 | 0.311257 | 0.6   |
| Endometrial Cancer Signaling                                | 0.955 | 0.110917 | 0.311257 | 1 | 0.311257 | 0.6   |
| Type II Diabetes Mellitus Signaling                         | 0.955 | 0.110917 | 0.311257 | 1 | 0.311257 | 0.6   |
| Tight Junction Signaling                                    | 0.951 | 0.111944 | 0.311257 | 1 | 0.311257 | 0.667 |
| Regulation of eIF4 and p70S6K Signaling                     | 0.951 | 0.111944 | 0.311257 | 1 | 0.311257 | 0.667 |
| PCP pathway                                                 | 0.951 | 0.111944 | 0.311257 | 1 | 0.311257 | 0.667 |
| IL-15 Signaling                                             | 0.947 | 0.11298  | 0.311257 | 1 | 0.311257 | 0.615 |
| Dendritic Cell Maturation                                   | 0.947 | 0.11298  | 0.311257 | 1 | 0.311257 | 0.615 |
| FAK Signaling                                               | 0.947 | 0.11298  | 0.311257 | 1 | 0.311257 | 0.615 |
| PAK Signaling                                               | 0.947 | 0.11298  | 0.311257 | 1 | 0.311257 | 0.615 |
| Role of IL-17A in Arthritis                                 | 0.947 | 0.11298  | 0.311257 | 1 | 0.311257 | 0.615 |
| Apelin Endothelial Signaling Pathway                        | 0.947 | 0.11298  | 0.311257 | 1 | 0.311257 | 0.615 |
| CREB Signaling in Neurons                                   | 0.943 | 0.114025 | 0.311257 | 1 | 0.311257 | 0.636 |

|                                                                           |       |          |          |   |          |       |
|---------------------------------------------------------------------------|-------|----------|----------|---|----------|-------|
| Melanoma Signaling                                                        | 0.943 | 0.114025 | 0.311257 | 1 | 0.311257 | 0.636 |
| IL-17A Signaling in Airway Cells                                          | 0.943 | 0.114025 | 0.311257 | 1 | 0.311257 | 0.636 |
| Chemokine Signaling                                                       | 0.943 | 0.114025 | 0.311257 | 1 | 0.311257 | 0.636 |
| SPINK1 General Cancer Pathway                                             | 0.943 | 0.114025 | 0.311257 | 1 | 0.311257 | 0.636 |
| Axonal Guidance Signaling                                                 | 0.924 | 0.119124 | 0.322994 | 1 | 0.322994 | 0.512 |
| Role of Osteoblasts, Osteoclasts and Chondrocytes in Rheumatoid Arthritis | 0.91  | 0.123027 | 0.331352 | 1 | 0.331352 | 0.536 |
| Neuroinflammation Signaling Pathway                                       | 0.903 | 0.125026 | 0.334506 | 1 | 0.334506 | 0.513 |
| Adrenomedullin signaling pathway                                          | 0.866 | 0.136144 | 0.361858 | 1 | 0.361858 | 0.542 |
| Glucocorticoid Receptor Signaling                                         | 0.857 | 0.138995 | 0.36702  | 1 | 0.36702  | 0.514 |
| NRF2-mediated Oxidative Stress Response                                   | 0.845 | 0.142889 | 0.36769  | 1 | 0.36769  | 0.545 |
| Wnt/ $\beta$ -catenin Signaling                                           | 0.845 | 0.142889 | 0.36769  | 1 | 0.36769  | 0.545 |
| NF- $\kappa$ B Signaling                                                  | 0.845 | 0.142889 | 0.36769  | 1 | 0.36769  | 0.545 |
| Ephrin Receptor Signaling                                                 | 0.845 | 0.142889 | 0.36769  | 1 | 0.36769  | 0.545 |
| HMGB1 Signaling                                                           | 0.785 | 0.164059 | 0.399683 | 1 | 0.399683 | 0.562 |
| Human Embryonic Stem Cell Pluripotency                                    | 0.785 | 0.164059 | 0.399683 | 1 | 0.399683 | 0.562 |
| Systemic Lupus Erythematosus Signaling                                    | 0.785 | 0.164059 | 0.399683 | 1 | 0.399683 | 0.562 |
| JAK/Stat Signaling                                                        | 0.785 | 0.164059 | 0.399683 | 1 | 0.399683 | 0.562 |
| Circadian Rhythm Signaling                                                | 0.77  | 0.169824 | 0.399683 | 1 | 0.399683 | 1     |
| Cytotoxic T Lymphocyte-mediated Apoptosis of Target Cells                 | 0.77  | 0.169824 | 0.399683 | 1 | 0.399683 | 1     |
| Polyamine Regulation in Colon Cancer                                      | 0.77  | 0.169824 | 0.399683 | 1 | 0.399683 | 1     |
| Extrinsic Prothrombin Activation Pathway                                  | 0.77  | 0.169824 | 0.399683 | 1 | 0.399683 | 1     |
| Tumoricidal Function of Hepatic Natural Killer Cells                      | 0.77  | 0.169824 | 0.399683 | 1 | 0.399683 | 1     |
| Estrogen-mediated S-phase Entry                                           | 0.77  | 0.169824 | 0.399683 | 1 | 0.399683 | 1     |
| HIPPO signaling                                                           | 0.77  | 0.169824 | 0.399683 | 1 | 0.399683 | 1     |
| Interferon Signaling                                                      | 0.77  | 0.169824 | 0.399683 | 1 | 0.399683 | 1     |
| Endoplasmic Reticulum Stress Pathway                                      | 0.77  | 0.169824 | 0.399683 | 1 | 0.399683 | 1     |
| SPINK1 Pancreatic Cancer Pathway                                          | 0.77  | 0.169824 | 0.399683 | 1 | 0.399683 | 1     |
| MIF Regulation of Innate Immunity                                         | 0.764 | 0.172187 | 0.399683 | 1 | 0.399683 | 0.571 |
| Growth Hormone Signaling                                                  | 0.764 | 0.172187 | 0.399683 | 1 | 0.399683 | 0.571 |
| VEGF Signaling                                                            | 0.764 | 0.172187 | 0.399683 | 1 | 0.399683 | 0.571 |
| Regulation of IL-2 Expression in Activated and Anergic T Lymphocytes      | 0.747 | 0.179061 | 0.399683 | 1 | 0.399683 | 0.583 |
| G-Protein Coupled Receptor Signaling                                      | 0.74  | 0.18197  | 0.399683 | 1 | 0.399683 | 0.52  |
| Leptin Signaling in Obesity                                               | 0.73  | 0.186209 | 0.399683 | 1 | 0.399683 | 0.6   |
| eNOS Signaling                                                            | 0.73  | 0.186209 | 0.399683 | 1 | 0.399683 | 0.6   |
| Opioid Signaling Pathway                                                  | 0.717 | 0.191867 | 0.399683 | 1 | 0.399683 | 0.522 |

|                                                                                                       |       |          |          |   |          |       |
|-------------------------------------------------------------------------------------------------------|-------|----------|----------|---|----------|-------|
| NF- $\kappa$ B Activation by Viruses                                                                  | 0.714 | 0.193197 | 0.399683 | 1 | 0.399683 | 0.625 |
| IL-9 Signaling                                                                                        | 0.714 | 0.193197 | 0.399683 | 1 | 0.399683 | 0.625 |
| Virus Entry via Endocytic Pathways                                                                    | 0.714 | 0.193197 | 0.399683 | 1 | 0.399683 | 0.625 |
| Neuropathic Pain Signaling In Dorsal Horn Neurons                                                     | 0.714 | 0.193197 | 0.399683 | 1 | 0.399683 | 0.625 |
| G Beta Gamma Signaling                                                                                | 0.714 | 0.193197 | 0.399683 | 1 | 0.399683 | 0.625 |
| Paxillin Signaling                                                                                    | 0.714 | 0.193197 | 0.399683 | 1 | 0.399683 | 0.625 |
| Ephrin B Signaling                                                                                    | 0.714 | 0.193197 | 0.399683 | 1 | 0.399683 | 0.625 |
| Regulation of Cellular Mechanics by Calpain Protease                                                  | 0.714 | 0.193197 | 0.399683 | 1 | 0.399683 | 0.625 |
| Apelin Liver Signaling Pathway                                                                        | 0.714 | 0.193197 | 0.399683 | 1 | 0.399683 | 0.625 |
| IL-17A Signaling in Fibroblasts                                                                       | 0.712 | 0.194089 | 0.399683 | 1 | 0.399683 | 0.75  |
| Differential Regulation of Cytokine Production in Macrophages and T Helper Cells by IL-17A and IL-17F | 0.712 | 0.194089 | 0.399683 | 1 | 0.399683 | 0.75  |
| Differential Regulation of Cytokine Production in Intestinal Epithelial Cells by IL-17A and IL-17F    | 0.712 | 0.194089 | 0.399683 | 1 | 0.399683 | 0.75  |
| GADD45 Signaling                                                                                      | 0.712 | 0.194089 | 0.399683 | 1 | 0.399683 | 0.75  |
| Cardiac $\beta$ -adrenergic Signaling                                                                 | 0.712 | 0.194089 | 0.399683 | 1 | 0.399683 | 0.75  |
| Agrin Interactions at Neuromuscular Junction                                                          | 0.708 | 0.195884 | 0.399683 | 1 | 0.399683 | 0.667 |
| Androgen Signaling                                                                                    | 0.708 | 0.195884 | 0.399683 | 1 | 0.399683 | 0.667 |
| Sphingosine-1-phosphate Signaling                                                                     | 0.708 | 0.195884 | 0.399683 | 1 | 0.399683 | 0.667 |
| Role of p14/p19ARF in Tumor Suppression                                                               | 0.708 | 0.195884 | 0.399683 | 1 | 0.399683 | 0.667 |
| Cell Cycle: G1/S Checkpoint Regulation                                                                | 0.708 | 0.195884 | 0.399683 | 1 | 0.399683 | 0.667 |
| Renin-Angiotensin Signaling                                                                           | 0.693 | 0.202768 | 0.41165  | 1 | 0.41165  | 0.524 |
| Role of NANOG in Mammalian Embryonic Stem Cell Pluripotency                                           | 0.668 | 0.214783 | 0.429566 | 1 | 0.429566 | 0.526 |
| Role of MAPK Signaling in the Pathogenesis of Influenza                                               | 0.668 | 0.214783 | 0.429566 | 1 | 0.429566 | 0.526 |
| Insulin Receptor Signaling                                                                            | 0.668 | 0.214783 | 0.429566 | 1 | 0.429566 | 0.526 |
| PPAR $\alpha$ /RXR $\alpha$ Activation                                                                | 0.642 | 0.228034 | 0.449394 | 1 | 0.449394 | 0.529 |
| G $\alpha$ 12/13 Signaling                                                                            | 0.642 | 0.228034 | 0.449394 | 1 | 0.449394 | 0.529 |
| Integrin Signaling                                                                                    | 0.642 | 0.228034 | 0.449394 | 1 | 0.449394 | 0.529 |
| Role of Macrophages, Fibroblasts and Endothelial Cells in Rheumatoid Arthritis                        | 0.635 | 0.231739 | 0.454479 | 1 | 0.454479 | 0.486 |
| Adipogenesis pathway                                                                                  | 0.616 | 0.242103 | 0.47251  | 1 | 0.47251  | 0.533 |
| Huntington's Disease Signaling                                                                        | 0.606 | 0.247742 | 0.481192 | 1 | 0.481192 | 0.5   |
| Neuregulin Signaling                                                                                  | 0.59  | 0.25704  | 0.492152 | 1 | 0.492152 | 0.538 |
| TR/RXR Activation                                                                                     | 0.59  | 0.25704  | 0.492152 | 1 | 0.492152 | 0.538 |

|                                                                              |       |          |          |   |          |       |
|------------------------------------------------------------------------------|-------|----------|----------|---|----------|-------|
| Reelin Signaling in Neurons                                                  | 0.59  | 0.25704  | 0.492152 | 1 | 0.492152 | 0.538 |
| Endocannabinoid Developing Neuron Pathway                                    | 0.58  | 0.263027 | 0.50124  | 1 | 0.50124  | 0.5   |
| PXR/RXR Activation                                                           | 0.562 | 0.274157 | 0.513958 | 1 | 0.513958 | 0.545 |
| Basal Cell Carcinoma Signaling                                               | 0.562 | 0.274157 | 0.513958 | 1 | 0.513958 | 0.545 |
| Role of JAK1 and JAK3 in $\gamma$ c Cytokine Signaling                       | 0.562 | 0.274157 | 0.513958 | 1 | 0.513958 | 0.545 |
| Endothelin-1 Signaling                                                       | 0.561 | 0.274789 | 0.513958 | 1 | 0.513958 | 0.483 |
| Role of Pattern Recognition Receptors in Recognition of Bacteria and Viruses | 0.533 | 0.293089 | 0.538219 | 1 | 0.538219 | 0.556 |
| Angiopoietin Signaling                                                       | 0.533 | 0.293089 | 0.538219 | 1 | 0.538219 | 0.556 |
| iCOS-iCOSL Signaling in T Helper Cells                                       | 0.533 | 0.293089 | 0.538219 | 1 | 0.538219 | 0.556 |
| Role of PI3K/AKT Signaling in the Pathogenesis of Influenza                  | 0.533 | 0.293089 | 0.538219 | 1 | 0.538219 | 0.556 |
| Role of NFAT in Regulation of the Immune Response                            | 0.524 | 0.299226 | 0.544538 | 1 | 0.544538 | 0.5   |
| Signaling by Rho Family GTPases                                              | 0.524 | 0.299226 | 0.544538 | 1 | 0.544538 | 0.5   |
| Synaptic Long Term Potentiation                                              | 0.503 | 0.314051 | 0.558928 | 1 | 0.558928 | 0.571 |
| Oncostatin M Signaling                                                       | 0.503 | 0.314051 | 0.558928 | 1 | 0.558928 | 0.571 |
| Melatonin Signaling                                                          | 0.503 | 0.314051 | 0.558928 | 1 | 0.558928 | 0.571 |
| Role of IL-17F in Allergic Inflammatory Airway Diseases                      | 0.503 | 0.314051 | 0.558928 | 1 | 0.558928 | 0.571 |
| GP6 Signaling Pathway                                                        | 0.503 | 0.314051 | 0.558928 | 1 | 0.558928 | 0.571 |
| Thrombin Signaling                                                           | 0.496 | 0.319154 | 0.563049 | 1 | 0.563049 | 0.5   |
| p70S6K Signaling                                                             | 0.496 | 0.319154 | 0.563049 | 1 | 0.563049 | 0.5   |
| Hepatic Fibrosis / Hepatic Stellate Cell Activation                          | 0.478 | 0.33266  | 0.577409 | 1 | 0.577409 | 0.467 |
| TREM1 Signaling                                                              | 0.47  | 0.338844 | 0.577409 | 1 | 0.577409 | 0.6   |
| Graft-versus-Host Disease Signaling                                          | 0.47  | 0.338844 | 0.577409 | 1 | 0.577409 | 0.6   |
| Role of Hypercytokinemia/hyperchemokine in the Pathogenesis of Influenza     | 0.47  | 0.338844 | 0.577409 | 1 | 0.577409 | 0.6   |
| Cyclins and Cell Cycle Regulation                                            | 0.47  | 0.338844 | 0.577409 | 1 | 0.577409 | 0.6   |
| Ephrin A Signaling                                                           | 0.47  | 0.338844 | 0.577409 | 1 | 0.577409 | 0.6   |
| Protein Ubiquitination Pathway                                               | 0.47  | 0.338844 | 0.577409 | 1 | 0.577409 | 0.6   |
| Amyloid Processing                                                           | 0.47  | 0.338844 | 0.577409 | 1 | 0.577409 | 0.6   |
| Th2 Pathway                                                                  | 0.466 | 0.341979 | 0.577409 | 1 | 0.577409 | 0.5   |
| Fc Epsilon RI Signaling                                                      | 0.456 | 0.349945 | 0.577409 | 1 | 0.577409 | 0.476 |
| VEGF Family Ligand-Receptor Interactions                                     | 0.456 | 0.349945 | 0.577409 | 1 | 0.577409 | 0.476 |
| fMLP Signaling in Neutrophils                                                | 0.434 | 0.368129 | 0.577409 | 1 | 0.577409 | 0.5   |
| Hereditary Breast Cancer Signaling                                           | 0.434 | 0.368129 | 0.577409 | 1 | 0.577409 | 0.5   |
| Antioxidant Action of Vitamin C                                              | 0.434 | 0.368129 | 0.577409 | 1 | 0.577409 | 0.5   |

|                                                              |       |          |          |   |          |       |
|--------------------------------------------------------------|-------|----------|----------|---|----------|-------|
| Gαq Signaling                                                | 0.434 | 0.368129 | 0.577409 | 1 | 0.577409 | 0.5   |
| Nitric Oxide Signaling in the Cardiovascular System          | 0.434 | 0.368129 | 0.577409 | 1 | 0.577409 | 0.5   |
| IL-22 Signaling                                              | 0.432 | 0.369828 | 0.577409 | 1 | 0.577409 | 0.667 |
| Semaphorin Signaling in Neurons                              | 0.432 | 0.369828 | 0.577409 | 1 | 0.577409 | 0.667 |
| Mitotic Roles of Polo-Like Kinase                            | 0.432 | 0.369828 | 0.577409 | 1 | 0.577409 | 0.667 |
| Pathogenesis of Multiple Sclerosis                           | 0.432 | 0.369828 | 0.577409 | 1 | 0.577409 | 0.667 |
| Actin Nucleation by ARP-WASP Complex                         | 0.432 | 0.369828 | 0.577409 | 1 | 0.577409 | 0.667 |
| nNOS Signaling in Skeletal Muscle Cells                      | 0.432 | 0.369828 | 0.577409 | 1 | 0.577409 | 0.667 |
| autophagy                                                    | 0.432 | 0.369828 | 0.577409 | 1 | 0.577409 | 0.667 |
| Acute Phase Response Signaling                               | 0.427 | 0.374111 | 0.577409 | 1 | 0.577409 | 0.462 |
| cAMP-mediated signaling                                      | 0.427 | 0.374111 | 0.577409 | 1 | 0.577409 | 0.474 |
| Natural Killer Cell Signaling                                | 0.399 | 0.399025 | 0.577409 | 1 | 0.577409 | 0.5   |
| CDK5 Signaling                                               | 0.399 | 0.399025 | 0.577409 | 1 | 0.577409 | 0.5   |
| Role of NFAT in Cardiac Hypertrophy                          | 0.398 | 0.399945 | 0.577409 | 1 | 0.577409 | 0.471 |
| Role of RIG1-like Receptors in Antiviral Innate Immunity     | 0.384 | 0.413048 | 0.577409 | 1 | 0.577409 | 1     |
| Mechanisms of Viral Exit from Host Cells                     | 0.384 | 0.413048 | 0.577409 | 1 | 0.577409 | 1     |
| Cell Cycle Regulation by BTG Family Proteins                 | 0.384 | 0.413048 | 0.577409 | 1 | 0.577409 | 1     |
| TWEAK Signaling                                              | 0.384 | 0.413048 | 0.577409 | 1 | 0.577409 | 1     |
| Role of JAK1, JAK2 and TYK2 in Interferon Signaling          | 0.384 | 0.413048 | 0.577409 | 1 | 0.577409 | 1     |
| NAD Biosynthesis from 2-amino-3-carboxymuconate Semialdehyde | 0.384 | 0.413048 | 0.577409 | 1 | 0.577409 | 1     |
| NAD biosynthesis II (from tryptophan)                        | 0.384 | 0.413048 | 0.577409 | 1 | 0.577409 | 1     |
| Glutathione Redox Reactions I                                | 0.384 | 0.413048 | 0.577409 | 1 | 0.577409 | 1     |
| Heme Degradation                                             | 0.384 | 0.413048 | 0.577409 | 1 | 0.577409 | 1     |
| Tetrahydrofolate Salvage from 5,10-methenyltetrahydrofolate  | 0.384 | 0.413048 | 0.577409 | 1 | 0.577409 | 1     |
| γ-linolenate Biosynthesis II (Animals)                       | 0.384 | 0.413048 | 0.577409 | 1 | 0.577409 | 1     |
| Guanine and Guanosine Salvage I                              | 0.384 | 0.413048 | 0.577409 | 1 | 0.577409 | 1     |
| Tetrapyrrole Biosynthesis II                                 | 0.384 | 0.413048 | 0.577409 | 1 | 0.577409 | 1     |
| Oleate Biosynthesis II (Animals)                             | 0.384 | 0.413048 | 0.577409 | 1 | 0.577409 | 1     |
| 5-aminoimidazole Ribonucleotide Biosynthesis I               | 0.384 | 0.413048 | 0.577409 | 1 | 0.577409 | 1     |
| S-methyl-5'-thioadenosine Degradation II                     | 0.384 | 0.413048 | 0.577409 | 1 | 0.577409 | 1     |
| Glycogen Degradation III                                     | 0.384 | 0.413048 | 0.577409 | 1 | 0.577409 | 1     |
| Calcium Transport I                                          | 0.384 | 0.413048 | 0.577409 | 1 | 0.577409 | 1     |
| Glycogen Degradation II                                      | 0.384 | 0.413048 | 0.577409 | 1 | 0.577409 | 1     |



|                                                                                 |       |          |          |   |          |       |
|---------------------------------------------------------------------------------|-------|----------|----------|---|----------|-------|
| Mevalonate Pathway I                                                            | 0.384 | 0.413048 | 0.577409 | 1 | 0.577409 | 1     |
| Glutathione Redox Reactions II                                                  | 0.384 | 0.413048 | 0.577409 | 1 | 0.577409 | 1     |
| Heme Biosynthesis II                                                            | 0.384 | 0.413048 | 0.577409 | 1 | 0.577409 | 1     |
| Purine Nucleotides De Novo Biosynthesis II                                      | 0.384 | 0.413048 | 0.577409 | 1 | 0.577409 | 1     |
| Citrulline-Nitric Oxide Cycle                                                   | 0.384 | 0.413048 | 0.577409 | 1 | 0.577409 | 1     |
| Methionine Degradation I (to Homocysteine)                                      | 0.384 | 0.413048 | 0.577409 | 1 | 0.577409 | 1     |
| Superpathway of Methionine Degradation                                          | 0.384 | 0.413048 | 0.577409 | 1 | 0.577409 | 1     |
| S-adenosyl-L-methionine Biosynthesis                                            | 0.384 | 0.413048 | 0.577409 | 1 | 0.577409 | 1     |
| Cysteine Biosynthesis III (mammalia)                                            | 0.384 | 0.413048 | 0.577409 | 1 | 0.577409 | 1     |
| Vitamin-C Transport                                                             | 0.384 | 0.413048 | 0.577409 | 1 | 0.577409 | 1     |
| Oxidative Phosphorylation                                                       | 0.384 | 0.413048 | 0.577409 | 1 | 0.577409 | 1     |
| BER pathway                                                                     | 0.384 | 0.413048 | 0.577409 | 1 | 0.577409 | 1     |
| Antigen Presentation Pathway                                                    | 0.384 | 0.413048 | 0.577409 | 1 | 0.577409 | 1     |
| Actin Cytoskeleton Signaling                                                    | 0.367 | 0.429536 | 0.592262 | 1 | 0.592262 | 0.467 |
| Agranulocyte Adhesion and Diapedesis                                            | 0.367 | 0.429536 | 0.592262 | 1 | 0.592262 | 0.467 |
| Granulocyte Adhesion and Diapedesis                                             | 0.367 | 0.429536 | 0.592262 | 1 | 0.592262 | 0.467 |
| Th1 and Th2 Activation Pathway                                                  | 0.367 | 0.429536 | 0.592262 | 1 | 0.592262 | 0.467 |
| Crosstalk between Dendritic Cells and Natural Killer Cells                      | 0.361 | 0.435512 | 0.594415 | 1 | 0.594415 | 0.5   |
| Role of Wnt/GSK-3 $\beta$ Signaling in the Pathogenesis of Influenza            | 0.361 | 0.435512 | 0.594415 | 1 | 0.594415 | 0.5   |
| Estrogen Receptor Signaling                                                     | 0.361 | 0.435512 | 0.594415 | 1 | 0.594415 | 0.5   |
| STAT3 Pathway                                                                   | 0.357 | 0.439542 | 0.595889 | 1 | 0.595889 | 0.444 |
| Xenobiotic Metabolism Signaling                                                 | 0.357 | 0.439542 | 0.595889 | 1 | 0.595889 | 0.444 |
| Antiproliferative Role of Somatostatin Receptor 2                               | 0.333 | 0.464515 | 0.625547 | 1 | 0.625547 | 0.462 |
| ERK5 Signaling                                                                  | 0.333 | 0.464515 | 0.625547 | 1 | 0.625547 | 0.462 |
| LPS/IL-1 Mediated Inhibition of RXR Function                                    | 0.317 | 0.481948 | 0.629535 | 1 | 0.629535 | 0.444 |
| $\alpha$ -Adrenergic Signaling                                                  | 0.316 | 0.483059 | 0.629535 | 1 | 0.629535 | 0.5   |
| Allograft Rejection Signaling                                                   | 0.316 | 0.483059 | 0.629535 | 1 | 0.629535 | 0.5   |
| Dopamine-DARPP32 Feedback in cAMP Signaling                                     | 0.316 | 0.483059 | 0.629535 | 1 | 0.629535 | 0.5   |
| Remodeling of Epithelial Adherens Junctions                                     | 0.316 | 0.483059 | 0.629535 | 1 | 0.629535 | 0.5   |
| Wnt/Ca <sup>+</sup> pathway                                                     | 0.316 | 0.483059 | 0.629535 | 1 | 0.629535 | 0.5   |
| GPCR-Mediated Integration of Enteroendocrine Signaling Exemplified by an L Cell | 0.316 | 0.483059 | 0.629535 | 1 | 0.629535 | 0.5   |
| Phagosome Formation                                                             | 0.316 | 0.483059 | 0.629535 | 1 | 0.629535 | 0.5   |

|                                                                         |       |          |          |   |          |       |
|-------------------------------------------------------------------------|-------|----------|----------|---|----------|-------|
| Phagosome Maturation                                                    | 0.316 | 0.483059 | 0.629535 | 1 | 0.629535 | 0.5   |
| Apelin Cardiomyocyte Signaling Pathway                                  | 0.316 | 0.483059 | 0.629535 | 1 | 0.629535 | 0.5   |
| MIF-mediated Glucocorticoid Regulation                                  | 0.298 | 0.503501 | 0.654065 | 1 | 0.654065 | 0.455 |
| Atherosclerosis Signaling                                               | 0.287 | 0.516416 | 0.666557 | 1 | 0.666557 | 0.438 |
| Gap Junction Signaling                                                  | 0.287 | 0.516416 | 0.666557 | 1 | 0.666557 | 0.438 |
| Airway Pathology in Chronic Obstructive Pulmonary Disease               | 0.262 | 0.547016 | 0.691634 | 1 | 0.691634 | 0.5   |
| Cardiomyocyte Differentiation via BMP Receptors                         | 0.262 | 0.547016 | 0.691634 | 1 | 0.691634 | 0.5   |
| Fatty Acid $\alpha$ -oxidation                                          | 0.262 | 0.547016 | 0.691634 | 1 | 0.691634 | 0.5   |
| Inhibition of Matrix Metalloproteases                                   | 0.262 | 0.547016 | 0.691634 | 1 | 0.691634 | 0.5   |
| Cell Cycle: G2/M DNA Damage Checkpoint Regulation                       | 0.262 | 0.547016 | 0.691634 | 1 | 0.691634 | 0.5   |
| Sonic Hedgehog Signaling                                                | 0.262 | 0.547016 | 0.691634 | 1 | 0.691634 | 0.5   |
| Communication between Innate and Adaptive Immune Cells                  | 0.26  | 0.549541 | 0.691634 | 1 | 0.691634 | 0.444 |
| Macropinocytosis Signaling                                              | 0.26  | 0.549541 | 0.691634 | 1 | 0.691634 | 0.444 |
| Superpathway of Inositol Phosphate Compounds                            | 0.256 | 0.554626 | 0.693711 | 1 | 0.693711 | 0.429 |
| 3-phosphoinositide Biosynthesis                                         | 0.256 | 0.554626 | 0.693711 | 1 | 0.693711 | 0.429 |
| CCR3 Signaling in Eosinophils                                           | 0.252 | 0.559758 | 0.697969 | 1 | 0.697969 | 0.421 |
| Th1 Pathway                                                             | 0.222 | 0.599791 | 0.745586 | 1 | 0.745586 | 0.417 |
| Coagulation System                                                      | 0.215 | 0.609537 | 0.748489 | 1 | 0.748489 | 0.429 |
| CTLA4 Signaling in Cytotoxic T Lymphocytes                              | 0.215 | 0.609537 | 0.748489 | 1 | 0.748489 | 0.429 |
| Role of Oct4 in Mammalian Embryonic Stem Cell Pluripotency              | 0.215 | 0.609537 | 0.748489 | 1 | 0.748489 | 0.429 |
| Autoimmune Thyroid Disease Signaling                                    | 0.215 | 0.609537 | 0.748489 | 1 | 0.748489 | 0.429 |
| Regulation of Actin-based Motility by Rho                               | 0.183 | 0.656145 | 0.772836 | 1 | 0.772836 | 0.5   |
| Fc $\gamma$ Receptor-mediated Phagocytosis in Macrophages and Monocytes | 0.183 | 0.656145 | 0.772836 | 1 | 0.772836 | 0.5   |
| IL-15 Production                                                        | 0.183 | 0.656145 | 0.772836 | 1 | 0.772836 | 0.5   |
| Airway Inflammation in Asthma                                           | 0.183 | 0.656145 | 0.772836 | 1 | 0.772836 | 0.5   |
| DNA Double-Strand Break Repair by Homologous Recombination              | 0.183 | 0.656145 | 0.772836 | 1 | 0.772836 | 0.5   |
| nNOS Signaling in Neurons                                               | 0.183 | 0.656145 | 0.772836 | 1 | 0.772836 | 0.5   |
| Prostanoid Biosynthesis                                                 | 0.183 | 0.656145 | 0.772836 | 1 | 0.772836 | 0.5   |
| Superpathway of Citrulline Metabolism                                   | 0.183 | 0.656145 | 0.772836 | 1 | 0.772836 | 0.5   |
| Triacylglycerol Biosynthesis                                            | 0.183 | 0.656145 | 0.772836 | 1 | 0.772836 | 0.5   |
| Superpathway of                                                         | 0.183 | 0.656145 | 0.772836 | 1 | 0.772836 | 0.5   |

|                                                                   |       |          |          |   |          |       |
|-------------------------------------------------------------------|-------|----------|----------|---|----------|-------|
| Geranylgeranyldiphosphate Biosynthesis I (via Mevalonate)         |       |          |          |   |          |       |
| Superpathway of Cholesterol Biosynthesis                          | 0.183 | 0.656145 | 0.772836 | 1 | 0.772836 | 0.5   |
| Phototransduction Pathway                                         | 0.183 | 0.656145 | 0.772836 | 1 | 0.772836 | 0.5   |
| Notch Signaling                                                   | 0.183 | 0.656145 | 0.772836 | 1 | 0.772836 | 0.5   |
| Gustation Pathway                                                 | 0.183 | 0.656145 | 0.772836 | 1 | 0.772836 | 0.5   |
| Synaptic Long Term Depression                                     | 0     | 1        | 1        | 1 | 1        | 0.353 |
| LXR/RXR Activation                                                | 0     | 1        | 1        | 1 | 1        | 0.389 |
| VDR/RXR Activation                                                | 0     | 1        | 1        | 1 | 1        | 0.333 |
| FXR/RXR Activation                                                | 0     | 1        | 1        | 1 | 1        | 0.375 |
| Role of BRCA1 in DNA Damage Response                              | 0     | 1        | 1        | 1 | 1        | 0.333 |
| Caveolar-mediated Endocytosis Signaling                           | 0     | 1        | 1        | 1 | 1        | 0.4   |
| T Helper Cell Differentiation                                     | 0     | 1        | 1        | 1 | 1        | 0.286 |
| Role of Cytokines in Mediating Communication between Immune Cells | 0     | 1        | 1        | 1 | 1        | 0.333 |
| Cellular Effects of Sildenafil (Viagra)                           | 0     | 1        | 1        | 1 | 1        | 0.2   |
| Factors Promoting Cardiogenesis in Vertebrates                    | 0     | 1        | 1        | 1 | 1        | 0.375 |
| Role of CHK Proteins in Cell Cycle Checkpoint Control             | 0     | 1        | 1        | 1 | 1        | 0.25  |
| G Protein Signaling Mediated by Tubby                             | 0     | 1        | 1        | 1 | 1        | 0.333 |
| RhoA Signaling                                                    | 0     | 1        | 1        | 1 | 1        | 0.375 |
| Phospholipase C Signaling                                         | 0     | 1        | 1        | 1 | 1        | 0.333 |
| Altered T Cell and B Cell Signaling in Rheumatoid Arthritis       | 0     | 1        | 1        | 1 | 1        | 0.333 |
| Protein Kinase A Signaling                                        | 0     | 1        | 1        | 1 | 1        | 0.409 |
| Neuroprotective Role of THOP1 in Alzheimer's Disease              | 0     | 1        | 1        | 1 | 1        | 0.364 |
| Nur77 Signaling in T Lymphocytes                                  | 0     | 1        | 1        | 1 | 1        | 0.143 |
| Cell Cycle Control of Chromosomal Replication                     | 0     | 1        | 1        | 1 | 1        | 0.25  |
| Role of JAK2 in Hormone-like Cytokine Signaling                   | 0     | 1        | 1        | 1 | 1        | 0.125 |
| Role of JAK family kinases in IL-6-type Cytokine Signaling        | 0     | 1        | 1        | 1 | 1        | 0.4   |
| RhoGDI Signaling                                                  | 0     | 1        | 1        | 1 | 1        | 0.375 |
| Netrin Signaling                                                  | 0     | 1        | 1        | 1 | 1        | 0.25  |
| Bupropion Degradation                                             | 0     | 1        | 1        | 1 | 1        | 0.2   |
| Nicotine Degradation III                                          | 0     | 1        | 1        | 1 | 1        | 0.167 |
| Dopamine Degradation                                              | 0     | 1        | 1        | 1 | 1        | 0.333 |

|                                                         |   |   |   |   |   |       |
|---------------------------------------------------------|---|---|---|---|---|-------|
| D-myo-inositol-5-phosphate Metabolism                   | 0 | 1 | 1 | 1 | 1 | 0.4   |
| Melatonin Degradation I                                 | 0 | 1 | 1 | 1 | 1 | 0.167 |
| Pyridoxal 5'-phosphate Salvage Pathway                  | 0 | 1 | 1 | 1 | 1 | 0.4   |
| Phospholipases                                          | 0 | 1 | 1 | 1 | 1 | 0.25  |
| Estrogen Biosynthesis                                   | 0 | 1 | 1 | 1 | 1 | 0.2   |
| Tryptophan Degradation X (Mammalian, via Tryptamine)    | 0 | 1 | 1 | 1 | 1 | 0.25  |
| D-myo-inositol (1,4,5,6)-Tetrakisphosphate Biosynthesis | 0 | 1 | 1 | 1 | 1 | 0.4   |
| Nicotine Degradation II                                 | 0 | 1 | 1 | 1 | 1 | 0.167 |
| Serotonin Degradation                                   | 0 | 1 | 1 | 1 | 1 | 0.25  |
| D-myo-inositol (3,4,5,6)-tetrakisphosphate Biosynthesis | 0 | 1 | 1 | 1 | 1 | 0.4   |
| 3-phosphoinositide Degradation                          | 0 | 1 | 1 | 1 | 1 | 0.4   |
| Adenine and Adenosine Salvage III                       | 0 | 1 | 1 | 1 | 1 | 0.333 |
| Salvage Pathways of Pyrimidine Ribonucleotides          | 0 | 1 | 1 | 1 | 1 | 0.364 |
| Histamine Degradation                                   | 0 | 1 | 1 | 1 | 1 | 0.333 |
| Superpathway of Melatonin Degradation                   | 0 | 1 | 1 | 1 | 1 | 0.167 |
| Noradrenaline and Adrenaline Degradation                | 0 | 1 | 1 | 1 | 1 | 0.333 |
| Acetone Degradation I (to Methylglyoxal)                | 0 | 1 | 1 | 1 | 1 | 0.2   |
| Putrescine Degradation III                              | 0 | 1 | 1 | 1 | 1 | 0.333 |
| Oxidative Ethanol Degradation III                       | 0 | 1 | 1 | 1 | 1 | 0.333 |
| Ethanol Degradation IV                                  | 0 | 1 | 1 | 1 | 1 | 0.333 |
| Ethanol Degradation II                                  | 0 | 1 | 1 | 1 | 1 | 0.333 |
| DNA damage-induced 14-3-3 $\sigma$ Signaling            | 0 | 1 | 1 | 1 | 1 | 0.333 |
| Epithelial Adherens Junction Signaling                  | 0 | 1 | 1 | 1 | 1 | 0.385 |
| G $\alpha$ i Signaling                                  | 0 | 1 | 1 | 1 | 1 | 0.364 |
| G $\alpha$ s Signaling                                  | 0 | 1 | 1 | 1 | 1 | 0.357 |
| Sperm Motility                                          | 0 | 1 | 1 | 1 | 1 | 0.273 |
| Dopamine Receptor Signaling                             | 0 | 1 | 1 | 1 | 1 | 0.333 |
| Glutamate Receptor Signaling                            | 0 | 1 | 1 | 1 | 1 | 0.333 |
| GPCR-Mediated Nutrient Sensing in Enteroendocrine Cells | 0 | 1 | 1 | 1 | 1 | 0.25  |
| Iron homeostasis signaling pathway                      | 0 | 1 | 1 | 1 | 1 | 0.364 |
| Th17 Activation Pathway                                 | 0 | 1 | 1 | 1 | 1 | 0.333 |
| Apelin Adipocyte Signaling Pathway                      | 0 | 1 | 1 | 1 | 1 | 0.2   |

|                      |   |   |   |   |   |       |
|----------------------|---|---|---|---|---|-------|
| Calcium Signaling    | 0 | 1 | 1 | 1 | 1 | 0.333 |
| Complement System    | 0 | 1 | 1 | 1 | 1 | 0.2   |
| Eicosanoid Signaling | 0 | 1 | 1 | 1 | 1 | 0.3   |

### Universal miRNAs

| Ingenuity Canonical Pathways                                                   | -log(p-value) | p-value  | adjusted p-value(FDR) | adjusted p-value(bonferroni) | adjusted p-value(BH) | Ratio |
|--------------------------------------------------------------------------------|---------------|----------|-----------------------|------------------------------|----------------------|-------|
| Molecular Mechanisms of Cancer                                                 | 4.18          | 6.61E-05 | 0.026317              | 0.028476                     | 0.026317             | 0.867 |
| Role of Tissue Factor in Cancer                                                | 3.79          | 0.000162 | 0.026317              | 0.0699                       | 0.026317             | 1     |
| RAR Activation                                                                 | 3.51          | 0.000309 | 0.026317              | 0.133192                     | 0.026317             | 0.952 |
| ILK Signaling                                                                  | 3.51          | 0.000309 | 0.026317              | 0.133192                     | 0.026317             | 0.952 |
| p53 Signaling                                                                  | 3.33          | 0.000468 | 0.026317              | 0.201594                     | 0.026317             | 1     |
| Estrogen-Dependent Breast Cancer Signaling                                     | 3.33          | 0.000468 | 0.026317              | 0.201594                     | 0.026317             | 1     |
| Aryl Hydrocarbon Receptor Signaling                                            | 3.3           | 0.000501 | 0.026317              | 0.216012                     | 0.026317             | 0.95  |
| IGF-1 Signaling                                                                | 3.3           | 0.000501 | 0.026317              | 0.216012                     | 0.026317             | 0.95  |
| Colorectal Cancer Metastasis Signaling                                         | 3.26          | 0.00055  | 0.026317              | 0.236852                     | 0.026317             | 0.861 |
| Germ Cell-Sertoli Cell Junction Signaling                                      | 3.09          | 0.000813 | 0.029194              | 0.35033                      | 0.029194             | 0.947 |
| B Cell Receptor Signaling                                                      | 3.09          | 0.000813 | 0.029194              | 0.35033                      | 0.029194             | 0.947 |
| Insulin Receptor Signaling                                                     | 3.09          | 0.000813 | 0.029194              | 0.35033                      | 0.029194             | 0.947 |
| EIF2 Signaling                                                                 | 2.89          | 0.001288 | 0.037184              | 0.555236                     | 0.037184             | 0.944 |
| AMPK Signaling                                                                 | 2.89          | 0.001288 | 0.037184              | 0.555236                     | 0.037184             | 0.944 |
| Myc Mediated Apoptosis Signaling                                               | 2.88          | 0.001318 | 0.037184              | 0.568169                     | 0.037184             | 1     |
| Ovarian Cancer Signaling                                                       | 2.86          | 0.00138  | 0.037184              | 0.594946                     | 0.037184             | 0.867 |
| Small Cell Lung Cancer Signaling                                               | 2.68          | 0.002089 | 0.043859              | 0.900487                     | 0.043859             | 0.941 |
| Gα12/13 Signaling                                                              | 2.68          | 0.002089 | 0.043859              | 0.900487                     | 0.043859             | 0.941 |
| mTOR Signaling                                                                 | 2.66          | 0.002188 | 0.043859              | 0.942925                     | 0.043859             | 1     |
| UVA-Induced MAPK Signaling                                                     | 2.66          | 0.002188 | 0.043859              | 0.942925                     | 0.043859             | 1     |
| Sumoylation Pathway                                                            | 2.66          | 0.002188 | 0.043859              | 0.942925                     | 0.043859             | 1     |
| Glioblastoma Multiforme Signaling                                              | 2.65          | 0.002239 | 0.043859              | 0.964889                     | 0.043859             | 0.88  |
| Role of Macrophages, Fibroblasts and Endothelial Cells in Rheumatoid Arthritis | 2.51          | 0.00309  | 0.054891              | 1                            | 0.054891             | 0.829 |
| 14-3-3-mediated Signaling                                                      | 2.48          | 0.003311 | 0.054891              | 1                            | 0.054891             | 0.938 |
| Prostate Cancer Signaling                                                      | 2.48          | 0.003311 | 0.054891              | 1                            | 0.054891             | 0.938 |
| PDGF Signaling                                                                 | 2.48          | 0.003311 | 0.054891              | 1                            | 0.054891             | 0.938 |
| PEDF Signaling                                                                 | 2.43          | 0.003715 | 0.05719               | 1                            | 0.05719              | 1     |
| UVB-Induced MAPK Signaling                                                     | 2.43          | 0.003715 | 0.05719               | 1                            | 0.05719              | 1     |
| Ceramide Signaling                                                             | 2.28          | 0.005248 | 0.074016              | 1                            | 0.074016             | 0.933 |
| Endometrial Cancer Signaling                                                   | 2.28          | 0.005248 | 0.074016              | 1                            | 0.074016             | 0.933 |
| HGF Signaling                                                                  | 2.26          | 0.005495 | 0.074016              | 1                            | 0.074016             | 0.895 |

|                                                                       |      |          |          |   |          |       |
|-----------------------------------------------------------------------|------|----------|----------|---|----------|-------|
| Pancreatic Adenocarcinoma Signaling                                   | 2.26 | 0.005495 | 0.074016 | 1 | 0.074016 | 0.895 |
| Ephrin Receptor Signaling                                             | 2.12 | 0.007586 | 0.085355 | 1 | 0.085355 | 0.864 |
| Regulation of the Epithelial-Mesenchymal Transition Pathway           | 2.11 | 0.007762 | 0.085355 | 1 | 0.085355 | 0.828 |
| LPS-stimulated MAPK Signaling                                         | 2.08 | 0.008318 | 0.085355 | 1 | 0.085355 | 0.929 |
| IL-17 Signaling                                                       | 2.08 | 0.008318 | 0.085355 | 1 | 0.085355 | 0.929 |
| Chronic Myeloid Leukemia Signaling                                    | 2.08 | 0.008318 | 0.085355 | 1 | 0.085355 | 0.929 |
| PI3K/AKT Signaling                                                    | 2.08 | 0.008318 | 0.085355 | 1 | 0.085355 | 0.929 |
| Non-Small Cell Lung Cancer Signaling                                  | 2.08 | 0.008318 | 0.085355 | 1 | 0.085355 | 0.889 |
| Sertoli Cell-Sertoli Cell Junction Signaling                          | 2.08 | 0.008318 | 0.085355 | 1 | 0.085355 | 0.889 |
| PPAR Signaling                                                        | 2.08 | 0.008318 | 0.085355 | 1 | 0.085355 | 0.889 |
| IL-6 Signaling                                                        | 2.08 | 0.008318 | 0.085355 | 1 | 0.085355 | 0.889 |
| ATM Signaling                                                         | 1.98 | 0.010471 | 0.094108 | 1 | 0.094108 | 1     |
| Cardiac Hypertrophy Signaling                                         | 1.95 | 0.01122  | 0.094108 | 1 | 0.094108 | 0.857 |
| Osteoarthritis Pathway                                                | 1.95 | 0.01122  | 0.094108 | 1 | 0.094108 | 0.857 |
| Sirtuin Signaling Pathway                                             | 1.95 | 0.01122  | 0.094108 | 1 | 0.094108 | 0.857 |
| PPAR $\alpha$ /RXR $\alpha$ Activation                                | 1.9  | 0.012589 | 0.094108 | 1 | 0.094108 | 0.882 |
| HIF1 $\alpha$ Signaling                                               | 1.9  | 0.012589 | 0.094108 | 1 | 0.094108 | 0.882 |
| Prolactin Signaling                                                   | 1.9  | 0.012589 | 0.094108 | 1 | 0.094108 | 0.882 |
| Glioma Signaling                                                      | 1.9  | 0.012589 | 0.094108 | 1 | 0.094108 | 0.882 |
| Production of Nitric Oxide and Reactive Oxygen Species in Macrophages | 1.9  | 0.012589 | 0.094108 | 1 | 0.094108 | 0.882 |
| NGF Signaling                                                         | 1.9  | 0.012589 | 0.094108 | 1 | 0.094108 | 0.882 |
| Telomerase Signaling                                                  | 1.9  | 0.012589 | 0.094108 | 1 | 0.094108 | 0.882 |
| TR/RXR Activation                                                     | 1.89 | 0.012882 | 0.094108 | 1 | 0.094108 | 0.923 |
| Thyroid Cancer Signaling                                              | 1.89 | 0.012882 | 0.094108 | 1 | 0.094108 | 0.923 |
| ErbB2-ErbB3 Signaling                                                 | 1.89 | 0.012882 | 0.094108 | 1 | 0.094108 | 0.923 |
| SAPK/JNK Signaling                                                    | 1.89 | 0.012882 | 0.094108 | 1 | 0.094108 | 0.923 |
| IL-7 Signaling Pathway                                                | 1.89 | 0.012882 | 0.094108 | 1 | 0.094108 | 0.923 |
| Apelin Endothelial Signaling Pathway                                  | 1.89 | 0.012882 | 0.094108 | 1 | 0.094108 | 0.923 |
| Xenobiotic Metabolism Signaling                                       | 1.81 | 0.015488 | 0.111257 | 1 | 0.111257 | 0.815 |
| Fc $\gamma$ RIIB Signaling in B Lymphocytes                           | 1.76 | 0.017378 | 0.11523  | 1 | 0.11523  | 1     |
| IL-9 Signaling                                                        | 1.76 | 0.017378 | 0.11523  | 1 | 0.11523  | 1     |
| Virus Entry via Endocytic Pathways                                    | 1.76 | 0.017378 | 0.11523  | 1 | 0.11523  | 1     |
| Docosahexaenoic Acid (DHA) Signaling                                  | 1.76 | 0.017378 | 0.11523  | 1 | 0.11523  | 1     |
| Paxillin Signaling                                                    | 1.76 | 0.017378 | 0.11523  | 1 | 0.11523  | 1     |
| Erythropoietin Signaling                                              | 1.73 | 0.018621 | 0.116313 | 1 | 0.116313 | 0.875 |
| CXCR4 Signaling                                                       | 1.73 | 0.018621 | 0.116313 | 1 | 0.116313 | 0.875 |
| Human Embryonic Stem Cell Pluripotency                                | 1.73 | 0.018621 | 0.116313 | 1 | 0.116313 | 0.875 |
| RANK Signaling in Osteoclasts                                         | 1.73 | 0.018621 | 0.116313 | 1 | 0.116313 | 0.875 |
| Hereditary Breast Cancer Signaling                                    | 1.69 | 0.020417 | 0.120546 | 1 | 0.120546 | 0.917 |

|                                                                           |      |          |          |   |          |       |
|---------------------------------------------------------------------------|------|----------|----------|---|----------|-------|
| HER-2 Signaling in Breast Cancer                                          | 1.69 | 0.020417 | 0.120546 | 1 | 0.120546 | 0.917 |
| EGF Signaling                                                             | 1.69 | 0.020417 | 0.120546 | 1 | 0.120546 | 0.917 |
| Apoptosis Signaling                                                       | 1.69 | 0.020417 | 0.120546 | 1 | 0.120546 | 0.917 |
| GNRH Signaling                                                            | 1.63 | 0.023442 | 0.134715 | 1 | 0.134715 | 0.842 |
| Mouse Embryonic Stem Cell Pluripotency                                    | 1.63 | 0.023442 | 0.134715 | 1 | 0.134715 | 0.842 |
| PTEN Signaling                                                            | 1.57 | 0.026915 | 0.137311 | 1 | 0.137311 | 0.818 |
| Wnt/ $\beta$ -catenin Signaling                                           | 1.57 | 0.026915 | 0.137311 | 1 | 0.137311 | 0.818 |
| Melanocyte Development and Pigmentation Signaling                         | 1.55 | 0.028184 | 0.137311 | 1 | 0.137311 | 0.867 |
| Type I Diabetes Mellitus Signaling                                        | 1.55 | 0.028184 | 0.137311 | 1 | 0.137311 | 0.867 |
| Acute Myeloid Leukemia Signaling                                          | 1.55 | 0.028184 | 0.137311 | 1 | 0.137311 | 0.867 |
| Type II Diabetes Mellitus Signaling                                       | 1.55 | 0.028184 | 0.137311 | 1 | 0.137311 | 0.867 |
| Breast Cancer Regulation by Stathmin1                                     | 1.55 | 0.028184 | 0.137311 | 1 | 0.137311 | 0.867 |
| ErbB Signaling                                                            | 1.55 | 0.028184 | 0.137311 | 1 | 0.137311 | 0.867 |
| Tec Kinase Signaling                                                      | 1.55 | 0.028184 | 0.137311 | 1 | 0.137311 | 0.867 |
| Adipogenesis pathway                                                      | 1.55 | 0.028184 | 0.137311 | 1 | 0.137311 | 0.867 |
| IL-10 Signaling                                                           | 1.54 | 0.02884  | 0.137311 | 1 | 0.137311 | 1     |
| Lymphotoxin $\beta$ Receptor Signaling                                    | 1.54 | 0.02884  | 0.137311 | 1 | 0.137311 | 1     |
| Retinoic acid Mediated Apoptosis Signaling                                | 1.54 | 0.02884  | 0.137311 | 1 | 0.137311 | 1     |
| Apelin Pancreas Signaling Pathway                                         | 1.54 | 0.02884  | 0.137311 | 1 | 0.137311 | 1     |
| Thrombopoietin Signaling                                                  | 1.51 | 0.030903 | 0.137311 | 1 | 0.137311 | 0.909 |
| Melanoma Signaling                                                        | 1.51 | 0.030903 | 0.137311 | 1 | 0.137311 | 0.909 |
| IL-17A Signaling in Airway Cells                                          | 1.51 | 0.030903 | 0.137311 | 1 | 0.137311 | 0.909 |
| GDNF Family Ligand-Receptor Interactions                                  | 1.51 | 0.030903 | 0.137311 | 1 | 0.137311 | 0.909 |
| UVC-Induced MAPK Signaling                                                | 1.51 | 0.030903 | 0.137311 | 1 | 0.137311 | 0.909 |
| IL-2 Signaling                                                            | 1.51 | 0.030903 | 0.137311 | 1 | 0.137311 | 0.909 |
| Death Receptor Signaling                                                  | 1.51 | 0.030903 | 0.137311 | 1 | 0.137311 | 0.909 |
| SPINK1 General Cancer Pathway                                             | 1.51 | 0.030903 | 0.137311 | 1 | 0.137311 | 0.909 |
| IL-8 Signaling                                                            | 1.5  | 0.031623 | 0.137671 | 1 | 0.137671 | 0.786 |
| Role of Osteoblasts, Osteoclasts and Chondrocytes in Rheumatoid Arthritis | 1.5  | 0.031623 | 0.137671 | 1 | 0.137671 | 0.786 |
| Neurotrophin/TRK Signaling                                                | 1.47 | 0.033884 | 0.146042 | 1 | 0.146042 | 0.833 |
| Growth Hormone Signaling                                                  | 1.39 | 0.040738 | 0.165642 | 1 | 0.165642 | 0.857 |
| P2Y Purigenic Receptor Signaling Pathway                                  | 1.39 | 0.040738 | 0.165642 | 1 | 0.165642 | 0.857 |
| Superpathway of Inositol Phosphate Compounds                              | 1.39 | 0.040738 | 0.165642 | 1 | 0.165642 | 0.857 |
| 3-phosphoinositide Biosynthesis                                           | 1.39 | 0.040738 | 0.165642 | 1 | 0.165642 | 0.857 |
| VEGF Signaling                                                            | 1.39 | 0.040738 | 0.165642 | 1 | 0.165642 | 0.857 |
| T Cell Receptor Signaling                                                 | 1.39 | 0.040738 | 0.165642 | 1 | 0.165642 | 0.857 |

|                                                             |      |          |          |   |          |       |
|-------------------------------------------------------------|------|----------|----------|---|----------|-------|
| STAT3 Pathway                                               | 1.37 | 0.042658 | 0.16909  | 1 | 0.16909  | 0.778 |
| Clathrin-mediated Endocytosis Signaling                     | 1.32 | 0.047863 | 0.16909  | 1 | 0.16909  | 0.824 |
| Bladder Cancer Signaling                                    | 1.32 | 0.047863 | 0.16909  | 1 | 0.16909  | 0.824 |
| Role of NFAT in Cardiac Hypertrophy                         | 1.32 | 0.047863 | 0.16909  | 1 | 0.16909  | 0.824 |
| Integrin Signaling                                          | 1.32 | 0.047863 | 0.16909  | 1 | 0.16909  | 0.824 |
| Amyotrophic Lateral Sclerosis Signaling                     | 1.32 | 0.047863 | 0.16909  | 1 | 0.16909  | 0.9   |
| CNTF Signaling                                              | 1.32 | 0.047863 | 0.16909  | 1 | 0.16909  | 0.9   |
| Cdc42 Signaling                                             | 1.32 | 0.047863 | 0.16909  | 1 | 0.16909  | 0.9   |
| Glioma Invasiveness Signaling                               | 1.32 | 0.047863 | 0.16909  | 1 | 0.16909  | 0.9   |
| ErbB4 Signaling                                             | 1.32 | 0.047863 | 0.16909  | 1 | 0.16909  | 0.9   |
| GM-CSF Signaling                                            | 1.32 | 0.047863 | 0.16909  | 1 | 0.16909  | 0.9   |
| Agrin Interactions at Neuromuscular Junction                | 1.32 | 0.047863 | 0.16909  | 1 | 0.16909  | 1     |
| Sphingosine-1-phosphate Signaling                           | 1.32 | 0.047863 | 0.16909  | 1 | 0.16909  | 1     |
| Role of p14/p19ARF in Tumor Suppression                     | 1.32 | 0.047863 | 0.16909  | 1 | 0.16909  | 1     |
| Wnt/Ca+ pathway                                             | 1.32 | 0.047863 | 0.16909  | 1 | 0.16909  | 1     |
| Cell Cycle: G1/S Checkpoint Regulation                      | 1.32 | 0.047863 | 0.16909  | 1 | 0.16909  | 1     |
| Relaxin Signaling                                           | 1.22 | 0.060256 | 0.199772 | 1 | 0.199772 | 0.846 |
| FLT3 Signaling in Hematopoietic Progenitor Cells            | 1.22 | 0.060256 | 0.199772 | 1 | 0.199772 | 0.846 |
| Aldosterone Signaling in Epithelial Cells                   | 1.22 | 0.060256 | 0.199772 | 1 | 0.199772 | 0.846 |
| ERK5 Signaling                                              | 1.22 | 0.060256 | 0.199772 | 1 | 0.199772 | 0.846 |
| FAK Signaling                                               | 1.22 | 0.060256 | 0.199772 | 1 | 0.199772 | 0.846 |
| PAK Signaling                                               | 1.22 | 0.060256 | 0.199772 | 1 | 0.199772 | 0.846 |
| Rac Signaling                                               | 1.22 | 0.060256 | 0.199772 | 1 | 0.199772 | 0.846 |
| Role of IL-17A in Arthritis                                 | 1.22 | 0.060256 | 0.199772 | 1 | 0.199772 | 0.846 |
| Leukocyte Extravasation Signaling                           | 1.17 | 0.067608 | 0.212695 | 1 | 0.212695 | 0.812 |
| IL-12 Signaling and Production in Macrophages               | 1.17 | 0.067608 | 0.212695 | 1 | 0.212695 | 0.812 |
| Renal Cell Carcinoma Signaling                              | 1.17 | 0.067608 | 0.212695 | 1 | 0.212695 | 0.812 |
| p70S6K Signaling                                            | 1.17 | 0.067608 | 0.212695 | 1 | 0.212695 | 0.812 |
| Systemic Lupus Erythematosus Signaling                      | 1.17 | 0.067608 | 0.212695 | 1 | 0.212695 | 0.812 |
| PKC $\theta$ Signaling in T Lymphocytes                     | 1.17 | 0.067608 | 0.212695 | 1 | 0.212695 | 0.812 |
| JAK/Stat Signaling                                          | 1.17 | 0.067608 | 0.212695 | 1 | 0.212695 | 0.812 |
| Role of NANOG in Mammalian Embryonic Stem Cell Pluripotency | 1.14 | 0.072444 | 0.215882 | 1 | 0.215882 | 0.789 |
| Induction of Apoptosis by HIV1                              | 1.14 | 0.072444 | 0.215882 | 1 | 0.215882 | 0.889 |
| Angiopoietin Signaling                                      | 1.14 | 0.072444 | 0.215882 | 1 | 0.215882 | 0.889 |
| Regulation of eIF4 and p70S6K Signaling                     | 1.14 | 0.072444 | 0.215882 | 1 | 0.215882 | 0.889 |



|                                                               |       |          |          |   |          |       |
|---------------------------------------------------------------|-------|----------|----------|---|----------|-------|
| PCP pathway                                                   | 1.14  | 0.072444 | 0.215882 | 1 | 0.215882 | 0.889 |
| FGF Signaling                                                 | 1.14  | 0.072444 | 0.215882 | 1 | 0.215882 | 0.889 |
| Cancer Drug Resistance By Drug Efflux                         | 1.14  | 0.072444 | 0.215882 | 1 | 0.215882 | 0.889 |
| NRF2-mediated Oxidative Stress Response                       | 1.13  | 0.074131 | 0.215882 | 1 | 0.215882 | 0.773 |
| NF-κB Signaling                                               | 1.13  | 0.074131 | 0.215882 | 1 | 0.215882 | 0.773 |
| Endocannabinoid Developing Neuron Pathway                     | 1.13  | 0.074131 | 0.215882 | 1 | 0.215882 | 0.773 |
| Endocannabinoid Cancer Inhibition Pathway                     | 1.13  | 0.074131 | 0.215882 | 1 | 0.215882 | 0.773 |
| Activation of IRF by Cytosolic Pattern Recognition Receptors  | 1.1   | 0.079433 | 0.218061 | 1 | 0.218061 | 1     |
| TREM1 Signaling                                               | 1.1   | 0.079433 | 0.218061 | 1 | 0.218061 | 1     |
| TNFR1 Signaling                                               | 1.1   | 0.079433 | 0.218061 | 1 | 0.218061 | 1     |
| TNFR2 Signaling                                               | 1.1   | 0.079433 | 0.218061 | 1 | 0.218061 | 1     |
| MSP-RON Signaling Pathway                                     | 1.1   | 0.079433 | 0.218061 | 1 | 0.218061 | 1     |
| Inhibition of Angiogenesis by TSP1                            | 1.1   | 0.079433 | 0.218061 | 1 | 0.218061 | 1     |
| Cyclins and Cell Cycle Regulation                             | 1.1   | 0.079433 | 0.218061 | 1 | 0.218061 | 1     |
| Role of JAK family kinases in IL-6-type Cytokine Signaling    | 1.1   | 0.079433 | 0.218061 | 1 | 0.218061 | 1     |
| iNOS Signaling                                                | 1.1   | 0.079433 | 0.218061 | 1 | 0.218061 | 1     |
| Th1 Pathway                                                   | 1.06  | 0.087096 | 0.237586 | 1 | 0.237586 | 0.833 |
| Huntington's Disease Signaling                                | 1     | 0.1      | 0.269375 | 1 | 0.269375 | 0.75  |
| Adrenomedullin signaling pathway                              | 1     | 0.1      | 0.269375 | 1 | 0.269375 | 0.75  |
| Mitochondrial Dysfunction                                     | 0.959 | 0.109901 | 0.27863  | 1 | 0.27863  | 0.875 |
| NF-κB Activation by Viruses                                   | 0.959 | 0.109901 | 0.27863  | 1 | 0.27863  | 0.875 |
| Neuropathic Pain Signaling In Dorsal Horn Neurons             | 0.959 | 0.109901 | 0.27863  | 1 | 0.27863  | 0.875 |
| G Beta Gamma Signaling                                        | 0.959 | 0.109901 | 0.27863  | 1 | 0.27863  | 0.875 |
| Role of Wnt/GSK-3β Signaling in the Pathogenesis of Influenza | 0.959 | 0.109901 | 0.27863  | 1 | 0.27863  | 0.875 |
| RhoGDI Signaling                                              | 0.959 | 0.109901 | 0.27863  | 1 | 0.27863  | 0.875 |
| Ephrin B Signaling                                            | 0.959 | 0.109901 | 0.27863  | 1 | 0.27863  | 0.875 |
| Regulation of Cellular Mechanics by Calpain Protease          | 0.959 | 0.109901 | 0.27863  | 1 | 0.27863  | 0.875 |
| Estrogen Receptor Signaling                                   | 0.959 | 0.109901 | 0.27863  | 1 | 0.27863  | 0.875 |
| Hypoxia Signaling in the Cardiovascular System                | 0.959 | 0.109901 | 0.27863  | 1 | 0.27863  | 0.875 |
| Glucocorticoid Receptor Signaling                             | 0.936 | 0.115878 | 0.292066 | 1 | 0.292066 | 0.714 |
| CREB Signaling in Neurons                                     | 0.91  | 0.123027 | 0.302998 | 1 | 0.302998 | 0.818 |
| Role of JAK1 and JAK3 in γC Cytokine Signaling                | 0.91  | 0.123027 | 0.302998 | 1 | 0.302998 | 0.818 |
| IL-4 Signaling                                                | 0.91  | 0.123027 | 0.302998 | 1 | 0.302998 | 0.818 |

|                                                            |       |          |          |   |          |       |
|------------------------------------------------------------|-------|----------|----------|---|----------|-------|
| Chemokine Signaling                                        | 0.91  | 0.123027 | 0.302998 | 1 | 0.302998 | 0.818 |
| Acute Phase Response Signaling                             | 0.9   | 0.125893 | 0.308293 | 1 | 0.308293 | 0.731 |
| IL-3 Signaling                                             | 0.889 | 0.129122 | 0.308293 | 1 | 0.308293 | 0.786 |
| Cholecystokinin/Gastrin-mediated Signaling                 | 0.883 | 0.130918 | 0.308293 | 1 | 0.308293 | 0.765 |
| Role of PKR in Interferon Induction and Antiviral Response | 0.876 | 0.133045 | 0.308293 | 1 | 0.308293 | 1     |
| B Cell Activating Factor Signaling                         | 0.876 | 0.133045 | 0.308293 | 1 | 0.308293 | 1     |
| April Mediated Signaling                                   | 0.876 | 0.133045 | 0.308293 | 1 | 0.308293 | 1     |
| IL-17A Signaling in Fibroblasts                            | 0.876 | 0.133045 | 0.308293 | 1 | 0.308293 | 1     |
| GADD45 Signaling                                           | 0.876 | 0.133045 | 0.308293 | 1 | 0.308293 | 1     |
| Fatty Acid $\alpha$ -oxidation                             | 0.876 | 0.133045 | 0.308293 | 1 | 0.308293 | 1     |
| Unfolded protein response                                  | 0.876 | 0.133045 | 0.308293 | 1 | 0.308293 | 1     |
| Cell Cycle: G2/M DNA Damage Checkpoint Regulation          | 0.876 | 0.133045 | 0.308293 | 1 | 0.308293 | 1     |
| 4-1BB Signaling in T Lymphocytes                           | 0.785 | 0.164059 | 0.370206 | 1 | 0.370206 | 0.857 |
| Oncostatin M Signaling                                     | 0.785 | 0.164059 | 0.370206 | 1 | 0.370206 | 0.857 |
| Role of IL-17F in Allergic Inflammatory Airway Diseases    | 0.785 | 0.164059 | 0.370206 | 1 | 0.370206 | 0.857 |
| Toll-like Receptor Signaling                               | 0.785 | 0.164059 | 0.370206 | 1 | 0.370206 | 0.857 |
| GP6 Signaling Pathway                                      | 0.785 | 0.164059 | 0.370206 | 1 | 0.370206 | 0.857 |
| Thrombin Signaling                                         | 0.762 | 0.172982 | 0.371519 | 1 | 0.371519 | 0.75  |
| HMGB1 Signaling                                            | 0.762 | 0.172982 | 0.371519 | 1 | 0.371519 | 0.75  |
| eNOS Signaling                                             | 0.762 | 0.172982 | 0.371519 | 1 | 0.371519 | 0.8   |
| Neuregulin Signaling                                       | 0.757 | 0.174985 | 0.371519 | 1 | 0.371519 | 0.769 |
| CD40 Signaling                                             | 0.757 | 0.174985 | 0.371519 | 1 | 0.371519 | 0.769 |
| IL-15 Signaling                                            | 0.757 | 0.174985 | 0.371519 | 1 | 0.371519 | 0.769 |
| Dendritic Cell Maturation                                  | 0.757 | 0.174985 | 0.371519 | 1 | 0.371519 | 0.769 |
| Reelin Signaling in Neurons                                | 0.757 | 0.174985 | 0.371519 | 1 | 0.371519 | 0.769 |
| PI3K Signaling in B Lymphocytes                            | 0.757 | 0.174985 | 0.371519 | 1 | 0.371519 | 0.769 |
| Epithelial Adherens Junction Signaling                     | 0.757 | 0.174985 | 0.371519 | 1 | 0.371519 | 0.769 |
| TGF- $\beta$ Signaling                                     | 0.757 | 0.174985 | 0.371519 | 1 | 0.371519 | 0.769 |
| BMP signaling pathway                                      | 0.757 | 0.174985 | 0.371519 | 1 | 0.371519 | 0.769 |
| Axonal Guidance Signaling                                  | 0.73  | 0.186209 | 0.393412 | 1 | 0.393412 | 0.683 |
| Role of NFAT in Regulation of the Immune Response          | 0.662 | 0.217771 | 0.434543 | 1 | 0.434543 | 0.722 |
| Signaling by Rho Family GTPases                            | 0.662 | 0.217771 | 0.434543 | 1 | 0.434543 | 0.722 |
| Role of BRCA1 in DNA Damage Response                       | 0.656 | 0.2208   | 0.434543 | 1 | 0.434543 | 1     |
| IL-22 Signaling                                            | 0.656 | 0.2208   | 0.434543 | 1 | 0.434543 | 1     |
| Mitotic Roles of Polo-Like Kinase                          | 0.656 | 0.2208   | 0.434543 | 1 | 0.434543 | 1     |
| Actin Nucleation by ARP-WASP Complex                       | 0.656 | 0.2208   | 0.434543 | 1 | 0.434543 | 1     |

|                                                             |       |          |          |   |          |       |
|-------------------------------------------------------------|-------|----------|----------|---|----------|-------|
| Dopamine Degradation                                        | 0.656 | 0.2208   | 0.434543 | 1 | 0.434543 | 1     |
| Retinol Biosynthesis                                        | 0.656 | 0.2208   | 0.434543 | 1 | 0.434543 | 1     |
| Histamine Degradation                                       | 0.656 | 0.2208   | 0.434543 | 1 | 0.434543 | 1     |
| Noradrenaline and Adrenaline Degradation                    | 0.656 | 0.2208   | 0.434543 | 1 | 0.434543 | 1     |
| Putrescine Degradation III                                  | 0.656 | 0.2208   | 0.434543 | 1 | 0.434543 | 1     |
| Oxidative Ethanol Degradation III                           | 0.656 | 0.2208   | 0.434543 | 1 | 0.434543 | 1     |
| Ethanol Degradation IV                                      | 0.656 | 0.2208   | 0.434543 | 1 | 0.434543 | 1     |
| Ethanol Degradation II                                      | 0.656 | 0.2208   | 0.434543 | 1 | 0.434543 | 1     |
| Th17 Activation Pathway                                     | 0.656 | 0.2208   | 0.434543 | 1 | 0.434543 | 1     |
| CD28 Signaling in T Helper Cells                            | 0.646 | 0.225944 | 0.440641 | 1 | 0.440641 | 0.733 |
| Th1 and Th2 Activation Pathway                              | 0.646 | 0.225944 | 0.440641 | 1 | 0.440641 | 0.733 |
| Gαq Signaling                                               | 0.631 | 0.233884 | 0.445645 | 1 | 0.445645 | 0.75  |
| VDR/RXR Activation                                          | 0.62  | 0.239883 | 0.445645 | 1 | 0.445645 | 0.833 |
| CD27 Signaling in Lymphocytes                               | 0.62  | 0.239883 | 0.445645 | 1 | 0.445645 | 0.778 |
| Androgen Signaling                                          | 0.62  | 0.239883 | 0.445645 | 1 | 0.445645 | 0.833 |
| IL-1 Signaling                                              | 0.62  | 0.239883 | 0.445645 | 1 | 0.445645 | 0.833 |
| Role of PI3K/AKT Signaling in the Pathogenesis of Influenza | 0.62  | 0.239883 | 0.445645 | 1 | 0.445645 | 0.778 |
| OX40 Signaling Pathway                                      | 0.62  | 0.239883 | 0.445645 | 1 | 0.445645 | 0.833 |
| IL-17A Signaling in Gastric Cells                           | 0.62  | 0.239883 | 0.445645 | 1 | 0.445645 | 0.833 |
| Remodeling of Epithelial Adherens Junctions                 | 0.62  | 0.239883 | 0.445645 | 1 | 0.445645 | 0.833 |
| Macropinocytosis Signaling                                  | 0.62  | 0.239883 | 0.445645 | 1 | 0.445645 | 0.778 |
| Apelin Cardiomyocyte Signaling Pathway                      | 0.62  | 0.239883 | 0.445645 | 1 | 0.445645 | 0.833 |
| Hepatic Cholestasis                                         | 0.561 | 0.274789 | 0.508301 | 1 | 0.508301 | 0.706 |
| Th2 Pathway                                                 | 0.538 | 0.289734 | 0.533656 | 1 | 0.533656 | 0.714 |
| Hepatic Fibrosis / Hepatic Stellate Cell Activation         | 0.514 | 0.306196 | 0.558122 | 1 | 0.558122 | 0.667 |
| Salvage Pathways of Pyrimidine Ribonucleotides              | 0.513 | 0.306902 | 0.558122 | 1 | 0.558122 | 0.727 |
| Iron homeostasis signaling pathway                          | 0.513 | 0.306902 | 0.558122 | 1 | 0.558122 | 0.727 |
| CCR5 Signaling in Macrophages                               | 0.488 | 0.325087 | 0.577184 | 1 | 0.577184 | 0.75  |
| Factors Promoting Cardiogenesis in Vertebrates              | 0.488 | 0.325087 | 0.577184 | 1 | 0.577184 | 0.75  |
| Crosstalk between Dendritic Cells and Natural Killer Cells  | 0.488 | 0.325087 | 0.577184 | 1 | 0.577184 | 0.75  |
| Apelin Liver Signaling Pathway                              | 0.488 | 0.325087 | 0.577184 | 1 | 0.577184 | 0.75  |
| Gap Junction Signaling                                      | 0.466 | 0.341979 | 0.577184 | 1 | 0.577184 | 0.688 |
| Caveolar-mediated Endocytosis Signaling                     | 0.462 | 0.345144 | 0.577184 | 1 | 0.577184 | 0.8   |
| Graft-versus-Host Disease Signaling                         | 0.462 | 0.345144 | 0.577184 | 1 | 0.577184 | 0.8   |

|                                                                              |       |          |          |   |          |       |
|------------------------------------------------------------------------------|-------|----------|----------|---|----------|-------|
| Role of Hypercytokinemia/hyperchemokine-mia in the Pathogenesis of Influenza | 0.462 | 0.345144 | 0.577184 | 1 | 0.577184 | 0.8   |
| Ephrin A Signaling                                                           | 0.462 | 0.345144 | 0.577184 | 1 | 0.577184 | 0.8   |
| D-myo-inositol-5-phosphate Metabolism                                        | 0.462 | 0.345144 | 0.577184 | 1 | 0.577184 | 0.8   |
| D-myo-inositol (1,4,5,6)-Tetrakisphosphate Biosynthesis                      | 0.462 | 0.345144 | 0.577184 | 1 | 0.577184 | 0.8   |
| D-myo-inositol (3,4,5,6)-tetrakisphosphate Biosynthesis                      | 0.462 | 0.345144 | 0.577184 | 1 | 0.577184 | 0.8   |
| 3-phosphoinositide Degradation                                               | 0.462 | 0.345144 | 0.577184 | 1 | 0.577184 | 0.8   |
| Amyloid Processing                                                           | 0.462 | 0.345144 | 0.577184 | 1 | 0.577184 | 0.8   |
| ERK/MAPK Signaling                                                           | 0.444 | 0.359749 | 0.577184 | 1 | 0.577184 | 0.655 |
| Renin-Angiotensin Signaling                                                  | 0.438 | 0.364754 | 0.577184 | 1 | 0.577184 | 0.667 |
| Fcγ Receptor-mediated Phagocytosis in Macrophages and Monocytes              | 0.437 | 0.365595 | 0.577184 | 1 | 0.577184 | 1     |
| Cytotoxic T Lymphocyte-mediated Apoptosis of Target Cells                    | 0.437 | 0.365595 | 0.577184 | 1 | 0.577184 | 1     |
| IL-15 Production                                                             | 0.437 | 0.365595 | 0.577184 | 1 | 0.577184 | 1     |
| Polyamine Regulation in Colon Cancer                                         | 0.437 | 0.365595 | 0.577184 | 1 | 0.577184 | 1     |
| Extrinsic Prothrombin Activation Pathway                                     | 0.437 | 0.365595 | 0.577184 | 1 | 0.577184 | 1     |
| Tumoricidal Function of Hepatic Natural Killer Cells                         | 0.437 | 0.365595 | 0.577184 | 1 | 0.577184 | 1     |
| DNA Double-Strand Break Repair by Homologous Recombination                   | 0.437 | 0.365595 | 0.577184 | 1 | 0.577184 | 1     |
| Transcriptional Regulatory Network in Embryonic Stem Cells                   | 0.437 | 0.365595 | 0.577184 | 1 | 0.577184 | 1     |
| Estrogen-mediated S-phase Entry                                              | 0.437 | 0.365595 | 0.577184 | 1 | 0.577184 | 1     |
| Heparan Sulfate Biosynthesis                                                 | 0.437 | 0.365595 | 0.577184 | 1 | 0.577184 | 1     |
| Heparan Sulfate Biosynthesis (Late Stages)                                   | 0.437 | 0.365595 | 0.577184 | 1 | 0.577184 | 1     |
| Triacylglycerol Degradation                                                  | 0.437 | 0.365595 | 0.577184 | 1 | 0.577184 | 1     |
| Triacylglycerol Biosynthesis                                                 | 0.437 | 0.365595 | 0.577184 | 1 | 0.577184 | 1     |
| Superpathway of Geranylgeranyldiphosphate Biosynthesis I (via Mevalonate)    | 0.437 | 0.365595 | 0.577184 | 1 | 0.577184 | 1     |
| Superpathway of Cholesterol Biosynthesis                                     | 0.437 | 0.365595 | 0.577184 | 1 | 0.577184 | 1     |
| HIPPO signaling                                                              | 0.437 | 0.365595 | 0.577184 | 1 | 0.577184 | 1     |
| Interferon Signaling                                                         | 0.437 | 0.365595 | 0.577184 | 1 | 0.577184 | 1     |
| Endoplasmic Reticulum Stress Pathway                                         | 0.437 | 0.365595 | 0.577184 | 1 | 0.577184 | 1     |
| Notch Signaling                                                              | 0.437 | 0.365595 | 0.577184 | 1 | 0.577184 | 1     |

|                                                                                                       |       |          |          |   |          |       |
|-------------------------------------------------------------------------------------------------------|-------|----------|----------|---|----------|-------|
| SPINK1 Pancreatic Cancer Pathway                                                                      | 0.437 | 0.365595 | 0.577184 | 1 | 0.577184 | 1     |
| Neuroinflammation Signaling Pathway                                                                   | 0.416 | 0.383707 | 0.603569 | 1 | 0.603569 | 0.641 |
| LPS/IL-1 Mediated Inhibition of RXR Function                                                          | 0.41  | 0.389045 | 0.607957 | 1 | 0.607957 | 0.667 |
| Natural Killer Cell Signaling                                                                         | 0.405 | 0.39355  | 0.607957 | 1 | 0.607957 | 0.7   |
| CDK5 Signaling                                                                                        | 0.405 | 0.39355  | 0.607957 | 1 | 0.607957 | 0.7   |
| Leptin Signaling in Obesity                                                                           | 0.405 | 0.39355  | 0.607957 | 1 | 0.607957 | 0.7   |
| Pyridoxal 5'-phosphate Salvage Pathway                                                                | 0.405 | 0.39355  | 0.607957 | 1 | 0.607957 | 0.7   |
| Actin Cytoskeleton Signaling                                                                          | 0.379 | 0.41783  | 0.64316  | 1 | 0.64316  | 0.667 |
| Synaptic Long Term Potentiation                                                                       | 0.366 | 0.430527 | 0.655678 | 1 | 0.655678 | 0.714 |
| CTLA4 Signaling in Cytotoxic T Lymphocytes                                                            | 0.366 | 0.430527 | 0.655678 | 1 | 0.655678 | 0.714 |
| Role of Oct4 in Mammalian Embryonic Stem Cell Pluripotency                                            | 0.366 | 0.430527 | 0.655678 | 1 | 0.655678 | 0.714 |
| G-Protein Coupled Receptor Signaling                                                                  | 0.353 | 0.443609 | 0.673223 | 1 | 0.673223 | 0.64  |
| fMLP Signaling in Neutrophils                                                                         | 0.345 | 0.451856 | 0.678571 | 1 | 0.678571 | 0.667 |
| Regulation of IL-2 Expression in Activated and Anergic T Lymphocytes                                  | 0.345 | 0.451856 | 0.678571 | 1 | 0.678571 | 0.667 |
| Nitric Oxide Signaling in the Cardiovascular System                                                   | 0.345 | 0.451856 | 0.678571 | 1 | 0.678571 | 0.667 |
| Airway Pathology in Chronic Obstructive Pulmonary Disease                                             | 0.315 | 0.484172 | 0.704994 | 1 | 0.704994 | 0.75  |
| Role of CHK Proteins in Cell Cycle Checkpoint Control                                                 | 0.315 | 0.484172 | 0.704994 | 1 | 0.704994 | 0.75  |
| Cell Cycle Control of Chromosomal Replication                                                         | 0.315 | 0.484172 | 0.704994 | 1 | 0.704994 | 0.75  |
| Differential Regulation of Cytokine Production in Macrophages and T Helper Cells by IL-17A and IL-17F | 0.315 | 0.484172 | 0.704994 | 1 | 0.704994 | 0.75  |
| Differential Regulation of Cytokine Production in Intestinal Epithelial Cells by IL-17A and IL-17F    | 0.315 | 0.484172 | 0.704994 | 1 | 0.704994 | 0.75  |
| Tryptophan Degradation X (Mammalian, via Tryptamine)                                                  | 0.315 | 0.484172 | 0.704994 | 1 | 0.704994 | 0.75  |
| Serotonin Degradation                                                                                 | 0.315 | 0.484172 | 0.704994 | 1 | 0.704994 | 0.75  |
| Inhibition of Matrix Metalloproteases                                                                 | 0.315 | 0.484172 | 0.704994 | 1 | 0.704994 | 0.75  |
| Cardiac $\beta$ -adrenergic Signaling                                                                 | 0.315 | 0.484172 | 0.704994 | 1 | 0.704994 | 0.75  |
| Tight Junction Signaling                                                                              | 0.305 | 0.49545  | 0.711797 | 1 | 0.711797 | 0.667 |
| Role of Pattern Recognition Receptors in Recognition of Bacteria and Viruses                          | 0.305 | 0.49545  | 0.711797 | 1 | 0.711797 | 0.667 |
| iCOS-iCOSL Signaling in T Helper Cells                                                                | 0.305 | 0.49545  | 0.711797 | 1 | 0.711797 | 0.667 |
| Communication between Innate and                                                                      | 0.305 | 0.49545  | 0.711797 | 1 | 0.711797 | 0.667 |

|                                                              |       |          |          |   |          |       |
|--------------------------------------------------------------|-------|----------|----------|---|----------|-------|
| Adaptive Immune Cells                                        |       |          |          |   |          |       |
| PXR/RXR Activation                                           | 0.262 | 0.547016 | 0.730456 | 1 | 0.730456 | 0.636 |
| Basal Cell Carcinoma Signaling                               | 0.262 | 0.547016 | 0.730456 | 1 | 0.730456 | 0.636 |
| $\alpha$ -Adrenergic Signaling                               | 0.256 | 0.554626 | 0.730456 | 1 | 0.730456 | 0.667 |
| Allograft Rejection Signaling                                | 0.256 | 0.554626 | 0.730456 | 1 | 0.730456 | 0.667 |
| Altered T Cell and B Cell Signaling in Rheumatoid Arthritis  | 0.256 | 0.554626 | 0.730456 | 1 | 0.730456 | 0.667 |
| Phagosome Formation                                          | 0.256 | 0.554626 | 0.730456 | 1 | 0.730456 | 0.667 |
| Opioid Signaling Pathway                                     | 0.238 | 0.578096 | 0.730456 | 1 | 0.730456 | 0.609 |
| LXR/RXR Activation                                           | 0.234 | 0.583445 | 0.730456 | 1 | 0.730456 | 0.611 |
| Antiproliferative Role of Somatostatin Receptor 2            | 0.228 | 0.591562 | 0.730456 | 1 | 0.730456 | 0.615 |
| Role of RIG1-like Receptors in Antiviral Innate Immunity     | 0.218 | 0.605341 | 0.730456 | 1 | 0.730456 | 1     |
| Mechanisms of Viral Exit from Host Cells                     | 0.218 | 0.605341 | 0.730456 | 1 | 0.730456 | 1     |
| Cell Cycle Regulation by BTG Family Proteins                 | 0.218 | 0.605341 | 0.730456 | 1 | 0.730456 | 1     |
| Maturity Onset Diabetes of Young (MODY) Signaling            | 0.218 | 0.605341 | 0.730456 | 1 | 0.730456 | 1     |
| Granzyme A Signaling                                         | 0.218 | 0.605341 | 0.730456 | 1 | 0.730456 | 1     |
| TWEAK Signaling                                              | 0.218 | 0.605341 | 0.730456 | 1 | 0.730456 | 1     |
| Role of Lipids/Lipid Rafts in the Pathogenesis of Influenza  | 0.218 | 0.605341 | 0.730456 | 1 | 0.730456 | 1     |
| Role of IL-17A in Psoriasis                                  | 0.218 | 0.605341 | 0.730456 | 1 | 0.730456 | 1     |
| Role of JAK1, JAK2 and TYK2 in Interferon Signaling          | 0.218 | 0.605341 | 0.730456 | 1 | 0.730456 | 1     |
| NAD Biosynthesis from 2-amino-3-carboxymuconate Semialdehyde | 0.218 | 0.605341 | 0.730456 | 1 | 0.730456 | 1     |
| NAD biosynthesis II (from tryptophan)                        | 0.218 | 0.605341 | 0.730456 | 1 | 0.730456 | 1     |
| Arginine Biosynthesis IV                                     | 0.218 | 0.605341 | 0.730456 | 1 | 0.730456 | 1     |
| Retinoate Biosynthesis II                                    | 0.218 | 0.605341 | 0.730456 | 1 | 0.730456 | 1     |
| Proline Biosynthesis II (from Arginine)                      | 0.218 | 0.605341 | 0.730456 | 1 | 0.730456 | 1     |
| Glutathione Redox Reactions I                                | 0.218 | 0.605341 | 0.730456 | 1 | 0.730456 | 1     |
| Heme Degradation                                             | 0.218 | 0.605341 | 0.730456 | 1 | 0.730456 | 1     |
| Tetrahydrofolate Salvage from 5,10-methenyltetrahydrofolate  | 0.218 | 0.605341 | 0.730456 | 1 | 0.730456 | 1     |
| Ceramide Biosynthesis                                        | 0.218 | 0.605341 | 0.730456 | 1 | 0.730456 | 1     |
| $\gamma$ -linolenate Biosynthesis II (Animals)               | 0.218 | 0.605341 | 0.730456 | 1 | 0.730456 | 1     |
| Guanine and Guanosine Salvage I                              | 0.218 | 0.605341 | 0.730456 | 1 | 0.730456 | 1     |
| Oleate Biosynthesis II (Animals)                             | 0.218 | 0.605341 | 0.730456 | 1 | 0.730456 | 1     |
| Arginine Degradation VI (Arginase 2 Pathway)                 | 0.218 | 0.605341 | 0.730456 | 1 | 0.730456 | 1     |

|                                                                   |       |          |          |   |          |       |
|-------------------------------------------------------------------|-------|----------|----------|---|----------|-------|
| 5-aminoimidazole Ribonucleotide Biosynthesis I                    | 0.218 | 0.605341 | 0.730456 | 1 | 0.730456 | 1     |
| S-methyl-5'-thioadenosine Degradation II                          | 0.218 | 0.605341 | 0.730456 | 1 | 0.730456 | 1     |
| Glycogen Degradation III                                          | 0.218 | 0.605341 | 0.730456 | 1 | 0.730456 | 1     |
| Calcium Transport I                                               | 0.218 | 0.605341 | 0.730456 | 1 | 0.730456 | 1     |
| Glycogen Degradation II                                           | 0.218 | 0.605341 | 0.730456 | 1 | 0.730456 | 1     |
| Citrulline Biosynthesis                                           | 0.218 | 0.605341 | 0.730456 | 1 | 0.730456 | 1     |
| Mevalonate Pathway I                                              | 0.218 | 0.605341 | 0.730456 | 1 | 0.730456 | 1     |
| Palmitate Biosynthesis I (Animals)                                | 0.218 | 0.605341 | 0.730456 | 1 | 0.730456 | 1     |
| Glutathione Redox Reactions II                                    | 0.218 | 0.605341 | 0.730456 | 1 | 0.730456 | 1     |
| Purine Nucleotides De Novo Biosynthesis II                        | 0.218 | 0.605341 | 0.730456 | 1 | 0.730456 | 1     |
| Methylglyoxal Degradation III                                     | 0.218 | 0.605341 | 0.730456 | 1 | 0.730456 | 1     |
| Fatty Acid Biosynthesis Initiation II                             | 0.218 | 0.605341 | 0.730456 | 1 | 0.730456 | 1     |
| Stearate Biosynthesis I (Animals)                                 | 0.218 | 0.605341 | 0.730456 | 1 | 0.730456 | 1     |
| Arginine Degradation I (Arginase Pathway)                         | 0.218 | 0.605341 | 0.730456 | 1 | 0.730456 | 1     |
| Trans, trans-farnesyl Diphosphate Biosynthesis                    | 0.218 | 0.605341 | 0.730456 | 1 | 0.730456 | 1     |
| Methionine Degradation I (to Homocysteine)                        | 0.218 | 0.605341 | 0.730456 | 1 | 0.730456 | 1     |
| Superpathway of Methionine Degradation                            | 0.218 | 0.605341 | 0.730456 | 1 | 0.730456 | 1     |
| Molybdenum Cofactor Biosynthesis                                  | 0.218 | 0.605341 | 0.730456 | 1 | 0.730456 | 1     |
| Folate Polyglutamylation                                          | 0.218 | 0.605341 | 0.730456 | 1 | 0.730456 | 1     |
| S-adenosyl-L-methionine Biosynthesis                              | 0.218 | 0.605341 | 0.730456 | 1 | 0.730456 | 1     |
| Cysteine Biosynthesis III (mammalia)                              | 0.218 | 0.605341 | 0.730456 | 1 | 0.730456 | 1     |
| Vitamin-C Transport                                               | 0.218 | 0.605341 | 0.730456 | 1 | 0.730456 | 1     |
| Oxidative Phosphorylation                                         | 0.218 | 0.605341 | 0.730456 | 1 | 0.730456 | 1     |
| BER pathway                                                       | 0.218 | 0.605341 | 0.730456 | 1 | 0.730456 | 1     |
| Antigen Presentation Pathway                                      | 0.218 | 0.605341 | 0.730456 | 1 | 0.730456 | 1     |
| RhoA Signaling                                                    | 0.217 | 0.606736 | 0.730456 | 1 | 0.730456 | 0.625 |
| Role of JAK2 in Hormone-like Cytokine Signaling                   | 0.217 | 0.606736 | 0.730456 | 1 | 0.730456 | 0.625 |
| Role of Cytokines in Mediating Communication between Immune Cells | 0.183 | 0.656145 | 0.772674 | 1 | 0.772674 | 0.667 |
| Semaphorin Signaling in Neurons                                   | 0.183 | 0.656145 | 0.772674 | 1 | 0.772674 | 0.667 |
| G Protein Signaling Mediated by Tubby                             | 0.183 | 0.656145 | 0.772674 | 1 | 0.772674 | 0.667 |
| Pathogenesis of Multiple Sclerosis                                | 0.183 | 0.656145 | 0.772674 | 1 | 0.772674 | 0.667 |
| Retinoate Biosynthesis I                                          | 0.183 | 0.656145 | 0.772674 | 1 | 0.772674 | 0.667 |
| DNA damage-induced 14-3-3 $\sigma$ Signaling                      | 0.183 | 0.656145 | 0.772674 | 1 | 0.772674 | 0.667 |

|                                                              |       |          |          |   |          |       |
|--------------------------------------------------------------|-------|----------|----------|---|----------|-------|
| GABA Receptor Signaling                                      | 0.183 | 0.656145 | 0.772674 | 1 | 0.772674 | 0.667 |
| autophagy                                                    | 0.183 | 0.656145 | 0.772674 | 1 | 0.772674 | 0.667 |
| Circadian Rhythm Signaling                                   | 0     | 1        | 1        | 1 | 1        | 0.5   |
| Fc Epsilon RI Signaling                                      | 0     | 1        | 1        | 1 | 1        | 0.476 |
| Synaptic Long Term Depression                                | 0     | 1        | 1        | 1 | 1        | 0.294 |
| Coagulation System                                           | 0     | 1        | 1        | 1 | 1        | 0.571 |
| FXR/RXR Activation                                           | 0     | 1        | 1        | 1 | 1        | 0.562 |
| Regulation of Actin-based Motility by Rho                    | 0     | 1        | 1        | 1 | 1        | 0.5   |
| MIF Regulation of Innate Immunity                            | 0     | 1        | 1        | 1 | 1        | 0.429 |
| Airway Inflammation in Asthma                                | 0     | 1        | 1        | 1 | 1        | 0.5   |
| T Helper Cell Differentiation                                | 0     | 1        | 1        | 1 | 1        | 0.429 |
| CCR3 Signaling in Eosinophils                                | 0     | 1        | 1        | 1 | 1        | 0.421 |
| Melatonin Signaling                                          | 0     | 1        | 1        | 1 | 1        | 0.571 |
| Cellular Effects of Sildenafil (Viagra)                      | 0     | 1        | 1        | 1 | 1        | 0.2   |
| Endothelin-1 Signaling                                       | 0     | 1        | 1        | 1 | 1        | 0.517 |
| Cardiomyocyte Differentiation via BMP Receptors              | 0     | 1        | 1        | 1 | 1        | 0.5   |
| Corticotropin Releasing Hormone Signaling                    | 0     | 1        | 1        | 1 | 1        | 0.5   |
| Autoimmune Thyroid Disease Signaling                         | 0     | 1        | 1        | 1 | 1        | 0.571 |
| Phospholipase C Signaling                                    | 0     | 1        | 1        | 1 | 1        | 0.429 |
| Atherosclerosis Signaling                                    | 0     | 1        | 1        | 1 | 1        | 0.438 |
| Protein Kinase A Signaling                                   | 0     | 1        | 1        | 1 | 1        | 0.591 |
| B Cell Development                                           | 0     | 1        | 1        | 1 | 1        | 0.5   |
| Neuroprotective Role of THOP1 in Alzheimer's Disease         | 0     | 1        | 1        | 1 | 1        | 0.364 |
| Nur77 Signaling in T Lymphocytes                             | 0     | 1        | 1        | 1 | 1        | 0.571 |
| Role of MAPK Signaling in the Pathogenesis of Influenza      | 0     | 1        | 1        | 1 | 1        | 0.474 |
| MIF-mediated Glucocorticoid Regulation                       | 0     | 1        | 1        | 1 | 1        | 0.273 |
| DNA Double-Strand Break Repair by Non-Homologous End Joining | 0     | 1        | 1        | 1 | 1        | 0.5   |
| Dopamine-DARPP32 Feedback in cAMP Signaling                  | 0     | 1        | 1        | 1 | 1        | 0.333 |
| Telomere Extension by Telomerase                             | 0     | 1        | 1        | 1 | 1        | 0.5   |
| Hematopoiesis from Multipotent Stem Cells                    | 0     | 1        | 1        | 1 | 1        | 0.5   |
| nNOS Signaling in Skeletal Muscle Cells                      | 0     | 1        | 1        | 1 | 1        | 0.333 |
| VEGF Family Ligand-Receptor Interactions                     | 0     | 1        | 1        | 1 | 1        | 0.524 |
| Netrin Signaling                                             | 0     | 1        | 1        | 1 | 1        | 0.5   |



|                                                                                 |   |   |   |   |   |       |
|---------------------------------------------------------------------------------|---|---|---|---|---|-------|
| Bupropion Degradation                                                           | 0 | 1 | 1 | 1 | 1 | 0.4   |
| Nicotine Degradation III                                                        | 0 | 1 | 1 | 1 | 1 | 0.333 |
| Prostanoid Biosynthesis                                                         | 0 | 1 | 1 | 1 | 1 | 0.5   |
| Superpathway of Citrulline Metabolism                                           | 0 | 1 | 1 | 1 | 1 | 0.5   |
| The Visual Cycle                                                                | 0 | 1 | 1 | 1 | 1 | 0.5   |
| Melatonin Degradation I                                                         | 0 | 1 | 1 | 1 | 1 | 0.333 |
| Estrogen Biosynthesis                                                           | 0 | 1 | 1 | 1 | 1 | 0.4   |
| Nicotine Degradation II                                                         | 0 | 1 | 1 | 1 | 1 | 0.333 |
| Superoxide Radicals Degradation                                                 | 0 | 1 | 1 | 1 | 1 | 0.5   |
| Adenine and Adenosine Salvage III                                               | 0 | 1 | 1 | 1 | 1 | 0.333 |
| Superpathway of Melatonin Degradation                                           | 0 | 1 | 1 | 1 | 1 | 0.333 |
| Acetone Degradation I (to Methylglyoxal)                                        | 0 | 1 | 1 | 1 | 1 | 0.4   |
| Antioxidant Action of Vitamin C                                                 | 0 | 1 | 1 | 1 | 1 | 0.333 |
| Gαi Signaling                                                                   | 0 | 1 | 1 | 1 | 1 | 0.545 |
| Gαs Signaling                                                                   | 0 | 1 | 1 | 1 | 1 | 0.429 |
| Agranulocyte Adhesion and Diapedesis                                            | 0 | 1 | 1 | 1 | 1 | 0.533 |
| Granulocyte Adhesion and Diapedesis                                             | 0 | 1 | 1 | 1 | 1 | 0.533 |
| Sperm Motility                                                                  | 0 | 1 | 1 | 1 | 1 | 0.182 |
| Protein Ubiquitination Pathway                                                  | 0 | 1 | 1 | 1 | 1 | 0.6   |
| Phototransduction Pathway                                                       | 0 | 1 | 1 | 1 | 1 | 0.5   |
| Sonic Hedgehog Signaling                                                        | 0 | 1 | 1 | 1 | 1 | 0.5   |
| Dopamine Receptor Signaling                                                     | 0 | 1 | 1 | 1 | 1 | 0.333 |
| cAMP-mediated signaling                                                         | 0 | 1 | 1 | 1 | 1 | 0.526 |
| p38 MAPK Signaling                                                              | 0 | 1 | 1 | 1 | 1 | 0.556 |
| Glutamate Receptor Signaling                                                    | 0 | 1 | 1 | 1 | 1 | 0.333 |
| GPCR-Mediated Integration of Enteroendocrine Signaling Exemplified by an L Cell | 0 | 1 | 1 | 1 | 1 | 0.333 |
| GPCR-Mediated Nutrient Sensing in Enteroendocrine Cells                         | 0 | 1 | 1 | 1 | 1 | 0.25  |
| Gustation Pathway                                                               | 0 | 1 | 1 | 1 | 1 | 0.5   |
| Phagosome Maturation                                                            | 0 | 1 | 1 | 1 | 1 | 0.333 |
| Apelin Cardiac Fibroblast Signaling Pathway                                     | 0 | 1 | 1 | 1 | 1 | 0.5   |
| Apelin Adipocyte Signaling Pathway                                              | 0 | 1 | 1 | 1 | 1 | 0.6   |
| Calcium Signaling                                                               | 0 | 1 | 1 | 1 | 1 | 0.444 |
| Complement System                                                               | 0 | 1 | 1 | 1 | 1 | 0.6   |
| Eicosanoid Signaling                                                            | 0 | 1 | 1 | 1 | 1 | 0.1   |
